# 1 The RAG1 Ubiquitin Ligase Domain Enhances the Assembly and Selection of T Cell Receptor 2 Genes to Restrain the Autoimmune Hazard of Generating T Cell Receptor Diversity

3  
4  
5 Thomas N. Burn<sup>\*,†,1</sup>; Charline Miot<sup>‡,1</sup>; Scott M. Gordon<sup>\*,§</sup>; Erica J. Culberson<sup>‡</sup>; Tamir Diamond<sup>\*,¶</sup>;  
6 Portia A. Kreiger<sup>‡</sup>; Katharina E. Hayer<sup>||</sup>; Anamika Bhattacharyya<sup>#,\*\*</sup>, Jessica M. Jones<sup>#</sup>, Craig H.  
7 Bassing<sup>\*,‡,2</sup>; Edward M. Behrens<sup>\*,†,2</sup>

8  
9  
10  
11 <sup>\*</sup>Institute for Immunology, Perelman School of Medicine, University of Pennsylvania, Philadelphia, PA  
12 19104

13 <sup>†</sup>Division of Rheumatology, The Children's Hospital of Philadelphia, Philadelphia, PA 19104

14 <sup>‡</sup>Department of Pathology and Laboratory Medicine, The Children's Hospital of Philadelphia,  
15 Philadelphia, PA 19104

16 <sup>§</sup>Division of Neonatology, The Children's Hospital of Philadelphia, Philadelphia, PA 19104

17 <sup>¶</sup>Division of Gastroenterology, Hepatology, and Nutrition, The Children's Hospital of Philadelphia,  
18 Philadelphia, PA 19104

19 <sup>||</sup>Department of Biomedical and Health Bioinformatics, The Children's Hospital of Philadelphia,  
20 Philadelphia, PA 19104

21 <sup>#</sup>Department of Biochemistry and Molecular and Cellular Sciences, Georgetown University,  
22 Washington, DC, 20057

23 <sup>\*\*</sup>Present Address: Vyome Therapeutics Lt., 501 Patparganj Industrial Area, Dehli, India

24 <sup>††</sup>Department of Pathology and Laboratory Medicine, The Perelman School of Medicine of the  
25 University of Pennsylvania, Philadelphia, PA 19104

26  
27 <sup>1</sup>Co-first Authors

28  
29 <sup>2</sup>Co-corresponding Authors:

30 Craig H. Bassing, Ph.D.  
31 Children's Hospital of Philadelphia  
32 4054 Colket Translational Research Building  
33 3501 Civic Center Blvd.  
34 Philadelphia, PA 19104  
35 Phone: 267-426-0311  
36 Email: [bassing@email.chop.edu](mailto:bassing@email.chop.edu)

37  
38 Edward M. Behrens, M.D.  
39 Children's Hospital of Philadelphia  
40 1102 Abramson Research Center  
41 3615 Civic Center Boulevard  
42 Philadelphia, PA 19104  
43 Phone: 267-426-0142  
44 Email: [behrens@email.chop.edu](mailto:behrens@email.chop.edu)

48  
49

## Abstract

50 RAG1/RAG2 (RAG) endonuclease-mediated assembly of diverse lymphocyte antigen receptor genes by  
51 V(D)J recombination is critical for the development and immune function of T and B cells. However, this  
52 process creates highly self-reactive cells that must be properly selected to suppress autoimmunity. The  
53 RAG1 protein contains a ubiquitin ligase domain that stabilizes RAG1 and stimulates RAG endonuclease  
54 activity *in vitro*. We report that mice with a mutation that inactivates the RAG1 ubiquitin ligase *in vitro*  
55 exhibit modestly reduced thymic cellularity, decreased assembly and altered repertoires of T cell receptor  
56 (TCR)  $\beta$  and  $\alpha$  genes in thymocytes, and impaired thymocyte developmental transitions that require the  
57 assembly of TCR $\beta$  or  $\alpha$  genes and signaling by their proteins. These RAG1 mutant mice also exhibit less  
58 efficient positive selection and superantigen-mediated negative selection of conventional  $\alpha\beta$  T cells, 2)  
59 impaired differentiation of iNKT lineage  $\alpha\beta$  T cells, and 3) CD4<sup>+</sup>  $\alpha\beta$  T cells with elevated autoimmune  
60 potential. Our findings demonstrate that the RAG1 ubiquitin ligase domain functions *in vivo* to stimulate  
61 the assembly and selection of TCR $\beta$  and TCR $\alpha$  genes, thereby establishing replete diversity of  $\alpha\beta$  TCRs  
62 and  $\alpha\beta$  T cell lineages while restraining the inherent autoimmune hazard of generating diverse antigen  
63 specificities.

64

## Introduction

65  
66  
67  
68 The ability of T and B lymphocyte populations to express antigen receptors able to recognize a potentially  
69 unlimited number of distinct pathogens is the fundamental basis of adaptive immunity. RAG1/RAG2  
70 (RAG) endonuclease-mediated assembly of T cell receptor (TCR) and immunoglobulin (Ig) genes through  
71 V(D)J recombination establishes this vast pool of diverse receptors. Germline TCR and Ig loci consist of  
72 variable (V), joining (J), and sometimes diversity (D), gene segments residing upstream of constant (C)  
73 region exons. During T and B cell development, the lymphocyte-specific RAG complex cooperates with  
74 lineage- and developmental stage-specific activation of TCR and Ig loci to perform V(D)J recombination  
75 (1). RAG induces DNA double strand breaks (DSBs) adjacent to two participating gene segments and  
76 cooperates with DSB repair factors to create V(D)J coding joins that comprise the second exons of  
77 assembled V(D)J-C antigen receptor genes (1, 2). The broad utilization of high numbers of gene segments  
78 and imprecision in V(D)J coding join formation creating a hypervariable complementatry-determineing  
79 region (the CDR3 region) cooperate to produce a vast population of diverse antigen receptor genes. Due  
80 to imprecise means of opening and processing coding ends, the outcomes of V(D)J recombination include  
81 out-of-frame genes unable to make protein and receptors that recognize self-antigens and have potential  
82 for autoimmunity. Accordingly, developing T and B lymphocytes engage quality control checkpoints to  
83 select for potentially beneficial antigen receptor proteins and against hazardous highly self-reactive  
84 receptors.

85  
86 Both immature T and B cells employ developmental programs that link functional protein expression from  
87 in-frame V(D)J rearrangements to signal either survival and continued differentiation or apoptosis (1).  
88 The maturation of  $\alpha\beta$  T cells in the thymus provides a paradigm for how V(D)J recombination and antigen  
89 receptor protein quality control checkpoints cooperate to create a large pool of lymphocytes with diverse  
90 receptors that provides immunity from pathogens without causing overt autoimmunity. After entering the

91 thymus, early thymocyte progenitor cells differentiate into CD44<sup>+</sup>CD25<sup>+</sup> stage 2 and then into CD44<sup>-</sup>  
92 CD25<sup>+</sup> stage 3 CD4<sup>-</sup>CD8<sup>-</sup> double negative (DN) thymocytes (3, 4). Both DN2 and DN3 cells express RAG  
93 and conduct V(D)J recombination of *Tcrb*, *Tcrd*, and/or *Tcrg* loci (3, 4). Although DN2-to-DN3  
94 thymocyte maturation can occur independent of RAG and V(D)J recombination, an in-frame *Tcrb*  
95 rearrangement is necessary for development beyond the DN3 stage (3, 4). The resultant TCR $\beta$  protein  
96 associates with invariant pT $\alpha$  protein to produce pre-TCR complexes that signal antigen-independent  
97 survival, proliferation, and differentiation of DN3 cells ( $\beta$ -selection) into CD44<sup>-</sup>CD25<sup>-</sup> stage 4 DN  
98 thymocytes and then CD4<sup>+</sup>CD8<sup>+</sup> double-positive (DP) thymocytes (3, 4). DP cells express RAG and  
99 conduct V(D)J recombination of *Tcra* loci, which typically proceeds through successive rounds of V-to-J  
100 rearrangement on both alleles (5). After an in-frame VJ rearrangement, the resulting TCR $\alpha$  protein can  
101 pair with TCR $\beta$  protein and yield surface  $\alpha\beta$  TCRs, which must signal to prevent death by neglect (6-9).  
102 This signal activation requires appropriate physical interactions between  $\alpha\beta$  TCRs and self-peptide/MHC  
103 (pMHC) complexes displayed on thymic epithelial cells (TECs) or dendritic cells (DCs), meaning that a  
104 functional  $\alpha\beta$  TCR is inherently self-reactive (6-9). Interactions below a particular low threshold of  
105 affinity (or avidity) cannot activate signalling to block apoptosis (6-9). At the other extreme, contacts  
106 above a higher threshold trigger strong signals that causes apoptosis (negative selection) to delete highly  
107 self-reactive cells with substantial autoimmune potential (6-9). Contacts between these thresholds activate  
108 TCR signals of a strength within a range that promotes survival and differentiation of DP cells (positive  
109 selection) into CD4<sup>+</sup> or CD8<sup>+</sup> single-positive (SP) thymocytes, which lack RAG expression and exit the  
110 thymus as mature  $\alpha\beta$  T cells (6-9). Strong TCR signals in DP cells can also activate an alternative agonist  
111 selection process that promotes differentiation of unconventional  $\alpha\beta$  T cell lineages: regulatory T (T reg)  
112 cells, intestinal intraepithelial lymphocytes (IELs), and invariant natural killer T (iNKT) cells (6, 7).  
113

114 The RAG1 protein N-terminus has a Zinc-binding RING finger ubiquitin ligase domain of undetermined  
115 relevance for antigen receptor gene assembly. *In vitro*, RAG1 autoubiquitylates on lysine 233 (10), which  
116 enhances RAG endonuclease activity *in vitro* as evidenced by impaired cleavage upon mutation of this  
117 residue (11). *In vitro*, RAG1 also ubiquitylates other proteins including histone H3 within chromatin (12,  
118 13). RAG1 RING domain mutations that disrupt ubiquitin ligase activity impair RAG-mediated cleavage  
119 and joining of chromatin substrates in cell lines, which could be due to loss of histone H3 ubiquitylation  
120 and/or alteration in RAG1 protein structure (13-15). The C328Y mutation of a critical structural zinc-  
121 binding cysteine of human RAG1 impairs V(D)J recombination and causes severe T and B cell  
122 immunodeficiency associated with uncontrolled proliferation of activated oligoclonal  $\alpha\beta$  T cells (16). The  
123 analogous C325Y mutation of mouse Rag1 protein (C325Y) *in vitro* destabilizes Rag1 tertiary structure,  
124 abrogates ubiquitin ligase activity, and reduces V(D)J recombination (22). Mice with homozygous Rag1  
125 C325Y mutation have a near complete block of  $\alpha\beta$  T cell development at the DN3 thymocyte stage due  
126 to impaired *Tcrb* recombination (14, 15). RING domains have a conserved proline (proline 326 in mouse  
127 Rag1) that is critical for ubiquitin ligase activity by permitting functional interaction with ubiquitin-  
128 conjugating enzymes (17, 18). Relative to C325Y mutation, P326G mutation abrogates Rag1 ubiquitin  
129 ligase activity equivalently, but has substantially less severe effects on both destabilizing tertiary structure  
130 of the Rag1 RING domain and reducing RAG endonuclease activity (15). Accordingly, P326 mutation of  
131 endogenous mouse Rag1 protein allows an approach to elucidate potential physiologic roles of the RAG1  
132 ubiquitin ligase domain beyond promoting V(D)J recombination by stabilizing RAG1 protein structure.

133

134 To determine potential *in vivo* functions of RAG1 ubiquitin ligase activity, we created and analyzed mice  
135 carrying a homozygous Rag1 P326G mutation. These mice exhibit phenotypes indicative of lower than  
136 normal RAG endonuclease activity including impaired B cell development, elevated  $Ig\kappa^+ : Ig\lambda^+$  B cell ratio,  
137 and decreased assembly of *Igh*, *Ig\kappa*, *Ig\lambda*, and *Tcrb* genes (19). We show here that these mice exhibit

138 decreased levels and altered repertoires of *Tcrb* or *Tera* rearrangements in DN3 or DP thymocytes,  
139 respectively, correlating with lower fractions of each cells selected for further differentiation. We find that  
140 the  $\alpha\beta$  TCR-signaled upregulation of CD69 is diminished during the initiation of positive selection. When  
141 assaying  $\alpha\beta$  TCRs expressing specific TCR $\beta$  or TCR $\alpha$  chains, we observe diminished efficiencies for  
142 superantigen-mediated negative selection of conventional  $\alpha\beta$  T cells and differentiation of iNKT lineage  
143  $\alpha\beta$  T cells. Finally, we show that mature CD4<sup>+</sup> effector  $\alpha\beta$  T cells of these mice exhibit normal immune  
144 responses to activation, yet possess greater intrinsic potential for autoimmunity. Our data demonstrate that  
145 the RAG1 ubiquitin ligase domain functions *in vivo* to stimulate TCR $\beta$  and TCR $\alpha$  gene assembly and  
146  $\alpha\beta$  TCR selection, thereby generating replete  $\alpha\beta$  TCR diversity and  $\alpha\beta$  T cell lineages while restraining  
147 the inherent autoimmune hazard of establishing diverse TCR specificities. We discuss how the RAG1  
148 ubiquitin ligase domain might function *in vivo* to regulate the assembly of TCR $\beta$  and TCR $\alpha$  genes,  
149 selection of  $\alpha\beta$  TCRs, and differentiation of  $\alpha\beta$  T cell lineages.

## Results

150  
151  
152  
153 **Homozygous Rag1 P326G mutation diminishes TCR gene assembly and subsequent thymocyte**  
154 **developmental stage transitions.**

155 To determine potential *in vivo* functions of the RAG1 ubiquitin ligase, we created and analyzed C57BL/6  
156 strain mice homozygous for the Rag1 P326G mutation (*Rag1*<sup>P326G/P326G</sup> mice; see Materials and Methods)  
157 that abrogates RAG1 ubiquitin ligase activity but minimally destabilizes RAG1 protein (15). We initially  
158 analyzed  $\alpha\beta$  T cell development and TCR gene rearrangements in *Rag1*<sup>P326G/P326G</sup> (*PG*) mice and wild-  
159 type (*WT*) mice. As compared to *WT* mice, *PG* mice have a ~2-fold higher percentage and number of DN3  
160 thymocytes and correspondingly lower percentage and number of DN4 thymocytes (Fig. 1, A and B). *PG*  
161 mice also exhibit ~10% reductions in the percentage and number of DP thymocytes and the ratio of CD4<sup>+</sup>  
162 SP thymocytes to DP thymocytes (Fig. 1, C-E). Despite these minor impairments of the DN3-to-DN4 and  
163 DP-to-SP thymocyte developmental transitions, *PG* mice have normal numbers of total thymocytes and  
164 splenic  $\alpha\beta$  T cells (Fig. 1 F). Using Taqman PCR to amplify V $\beta$  rearrangements to D $\beta$ 1J $\beta$ 1.1, D $\beta$ 1J $\beta$ 2.1,  
165 or D $\beta$ 2J $\beta$ 2.1 complexes in non-selected DN3 cells, we observed ~50% lower levels of rearrangement for  
166 nearly all individual V $\beta$  segments in *PG* mice (Fig. 2, A and B). Notably, the recombination of some V $\beta$   
167 segments involving J $\beta$ 2.1 were undetectable in *PG* mice (Fig. 2, A and B), indicating altered J $\beta$  repertoire  
168 from *Rag1*<sup>P326G</sup> mutation. *Rag1* or *Rag2* mutations that substantially decrease RAG endonuclease activity,  
169 thymocyte development, and thymic cellularity, also alter the usage of individual V $\beta$  segments (20, 21).  
170 However, high-throughput sequencing of *Tcrb* rearrangements in DN3 thymocytes shows similar usage  
171 of each V $\beta$  segment in *PG* and *WT* mice (Fig. 2 C), reflecting the modest reduction of *Tcrb* gene assembly  
172 in *PG* mice. This analysis also reveals modest alterations in D $\beta$  and J $\beta$  usage, but no difference in CDR3 $\beta$   
173 lengths in the *Tcrb* rearrangements of *PG* mice (Fig. 2, D and E; data not shown). Using Taqman PCR to  
174 amplify a subset of possible V $\alpha$ -to-J $\alpha$  rearrangements in non-selected DP thymocytes, we detected lower  
175 levels of rearrangements for many of the V $\alpha$ /J $\alpha$  combinations, particularly those involving the two most

176 distal  $J\alpha$  gene segments ( $J\alpha 17$ ,  $J\alpha 2$ ) tested, in *PG* mice (Fig. 2, F). Together, these data indicate that  
177 homozygous  $Rag1^{P326G}$  mutation produces RAG endonuclease complexes that catalyze decreased levels  
178 of *Tcrb* and *Tcra* rearrangements, alter the primary repertoires of *Tcrb* and *Tcra* genes, and support less  
179 efficient thymocyte developmental transitions that depend on the functional assembly of a *Tcrb* or *Tcra*  
180 gene. The lower efficiency of overall *Tcrb* and *Tcra* gene assembly certainly contributes to the diminished  
181 DN3-to-DP and DP-to-SP thymocyte developmental progressions observed in *PG* mice.

182

183 Notably, the degrees to which TCR gene rearrangements and  $\alpha\beta$  T cell development are reduced in *PG*  
184 mice are dramatically less severe than reported for homozygous  $Rag1^{C235Y}$  mutation (14). For example,  
185  $Rag1^{P236G}$  mice generate 90% of the normal number of DP thymocytes, whereas homozygous  $Rag1^{C235Y}$   
186 mice produce only 1% of the normal number of DP thymocytes. The markedly different severities of these  
187 phenotypes suggest that abrogation of  $Rag1$  ubiquitin ligase activity without substantial disruption of  $Rag1$   
188 protein structure only slightly impairs V(D)J recombination and  $\alpha\beta$  T cell development. Notably, the  
189  $Rag1^{P326G}$  protein is expressed at modestly higher levels in thymocytes than wild-type  $Rag1$  protein (19),  
190 indicating that reduced  $Rag1$  protein expression levels do not contribute to the slightly impaired  
191 development of  $\alpha\beta$  T cells in *PG* mice. As we were not able to detect  $Rag1$  ubiquitin ligase activity in *WT*  
192 mice, we could not confirm the expected abrogation of  $Rag1$  ubiquitin ligase activity in *PG* mice that was  
193 observed with  $Rag1^{P236G}$  mutation *in vitro*, leaving open the possibility that the mutant  $Rag1^{P326G}$  protein  
194 exhibits some level of ubiquitin ligase activity *in vivo*.

195

196 To confirm that the impaired development of  $\alpha\beta$  T cells in *PG* mice is due to cell intrinsic properties, we  
197 made and analyzed competitive bone marrow chimeric mice. These data show no significant differences  
198 in contributions of *WT* cells and *PG* cells at each of DN thymocyte stages (Supplemental Figure 1A). In  
199 marked contrast, there were greater contributions of *WT* cells at the DP and both SP thymocyte stages and



200 within the CD4<sup>+</sup> and CD8<sup>+</sup> splenic αβ T cell populations (Supplemental Figure 1A, B). The data support  
201 the notion that the decreased progression of Rag1<sup>P326G</sup> thymocytes beyond the DN stage is due to cell  
202 intrinsic alterations, most likely from the decreased assembly of TCRβ genes.

203

204

Figure 1

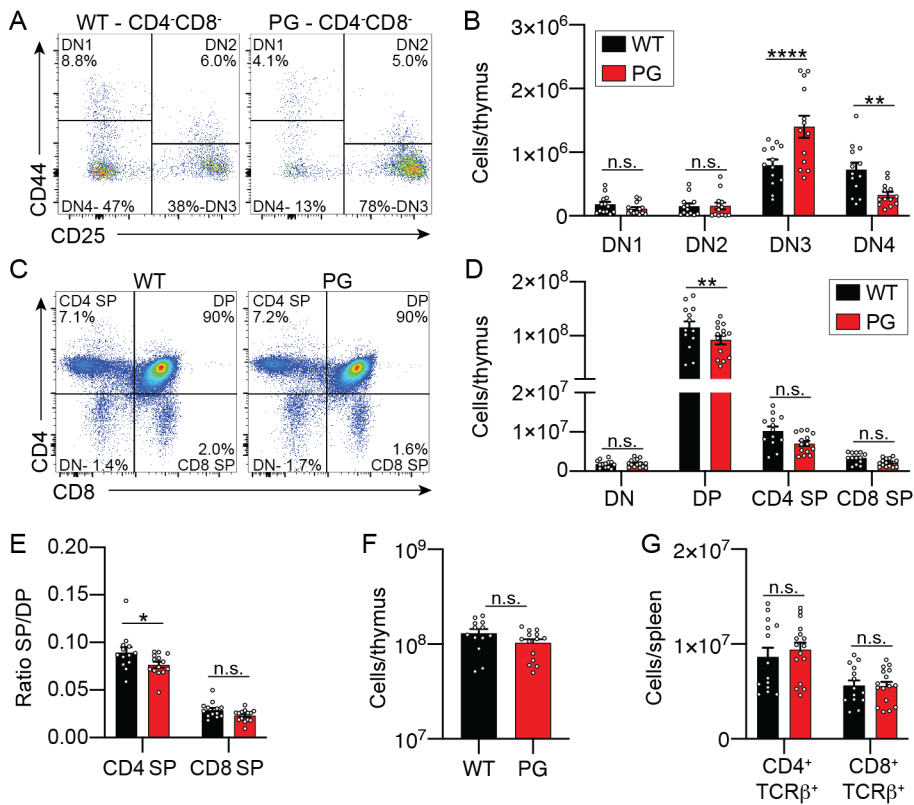

205

206 **Figure 1.** *PG* mice exhibit impaired thymocyte developmental transitions that require TCR gene  
 207 assembly. **(A)** Representative flow cytometry plots of DN stages of thymocyte development showing the  
 208 frequency of cells at each stage. **(B)** Quantification of numbers of cells in each DN stage. **(C)**  
 209 Representative flow cytometry plots of DN, DP, CD4<sup>+</sup> SP, and CD8<sup>+</sup> SP thymocytes. **(D)** Quantification  
 210 of numbers of cells in each stage. **(E)** Quantification of the ratio of CD4<sup>+</sup> SP or CD8<sup>+</sup> SP thymocytes to  
 211 DP thymocytes. **(F-G)** Quantification of the numbers of total thymocytes (F) and splenic αβ T cells (G).  
 212 (A-G) All data were collected from 6-10 weeks old mice and (B, D, E, F, and G) are combined from four  
 213 independent experiments including a total of 14-16 mice per genotype. Bars indicate mean +/- SEM. Stats:  
 214 2-way ANOVA with Sidak multiple comparison test. n.s. p>0.05; \* p<0.05, \*\*p<0.01, \*\*\* p<0.001, \*\*\*\*  
 215 p<0.0001.

216

Figure 2

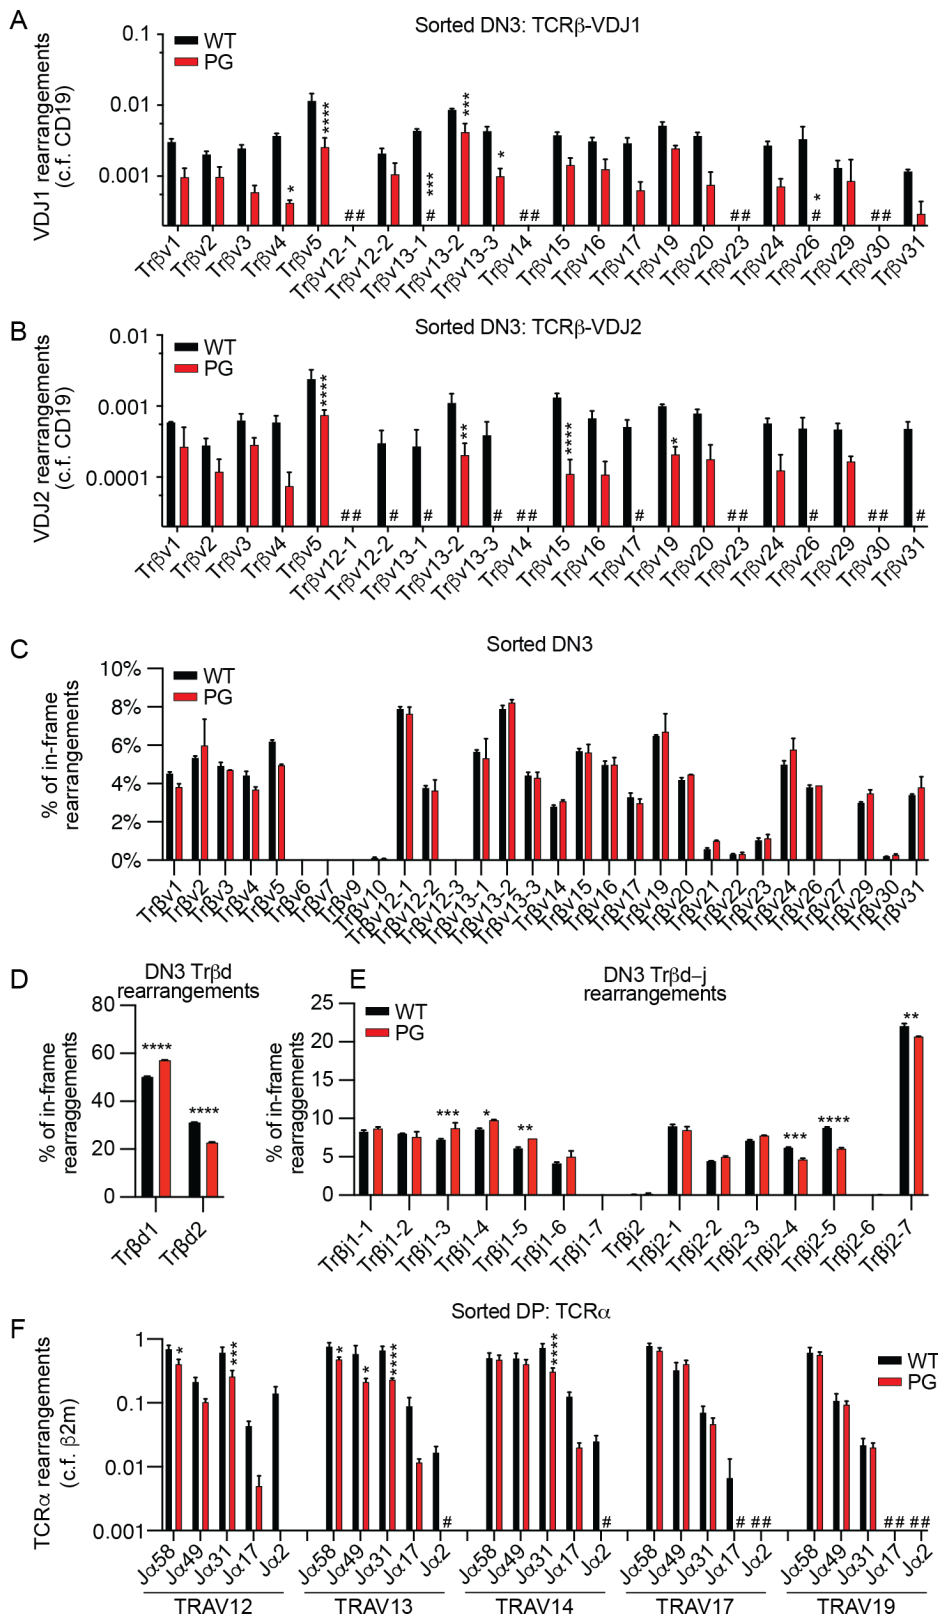

218 **Figure 2.** Thymocytes of *PG* mice support diminished levels of *Tcrb* and *Tcra* recombination. **(A-B)**  
219 Taqman qPCR quantification of rearrangements of each V $\beta$  segment to DJ $\beta$ 1.1 (A) or DJ $\beta$ 2.1 (B)  
220 complexes conducted on genomic DNA from DN3 thymocytes. Signals from each assay were normalized  
221 to values from an assay for the invariant CD19 gene. Shown are average values +/- SEM from three  
222 independent DN3 thymocyte preparations, each from a different mouse. **(C-E)** Adaptive Immunoseq  
223 quantification of the percentage usage of each V $\beta$  (C), D $\beta$  (D), or J $\beta$  (E) segment in *Tcrb* rearrangements  
224 of DN3 thymocytes. Shown are average values from two independent DN cell preparations. **(F)** qPCR  
225 quantification of specific V $\alpha$ /J $\alpha$  rearrangements performed on genomic DNA from DP thymocytes.  
226 Signals from each assay were normalized to values from an assay for the invariant  $\beta$ 2m gene. Shown are  
227 the average values +/- SEM from three independent DP cell preparations. For all graphs in figure: #, not  
228 detected, n.s.  $p > 0.05$ ; \*  $p < 0.05$ , \*\*  $p < 0.01$ , \*\*\*  $p < 0.001$ , \*\*\*\*  $p < 0.0001$   
229  
230

231 **Reduced *Tcrb* gene assembly impairs DN thymocyte development in homozygous Rag1 P326G mice.**

232 The greater than normal number of DN3 thymocytes in *PG* mice is not typical of a mutation that impairs

233 V(D)J recombination and could reflect altered  $\beta$ -selection. Thus, to distinguish potential contributions of

234 reduced *Tcrb* gene assembly versus decreased pre-TCR-signaling, we conducted a more refined analysis

235 of DN stage cells based on CD28 protein expression. After successful *Tcrb* gene assembly in

236 CD28<sup>-</sup>CD25<sup>high</sup> DN3a thymocytes, pre-TCR signaling drives differentiation of DN3b and then DN3c

237 thymocytes characterized by upregulation of CD28 and downregulation of CD25 (22). Mirroring relative

238 levels of *Tcrb* rearrangements in DN3 thymocytes, we observed decreased progression of DN3a cells to

239 the DN3b and DN3c stages, as well as a smaller fraction of DN3a cells expression TCR $\beta$  protein, in *PG*

240 mice relative to *WT* mice (Fig. 3, A - F). We compared the percentage of DN3a cells expressing TCR $\beta$

241 protein to the percentage of these cells that develop into DN3b cells. We found equivalent values between

242 *PG* and *WT* mice (Fig. 3, G). We also compared the percentage of total DN3 cells expressing TCR $\beta$  protein

243 to the fraction of these cells that progress to the DN4 stage. Here again we found equivalent values between

244 *PG* and *WT* mice (Supplemental Figure 2). Together, these data provide no evidence for diminished pre-

245 TCR signaled development of  $\beta$ -selected DN3 thymocytes. Therefore, the most plausible explanation for

246 impaired DN thymocyte development in *PG* mice is decreased levels of TCR $\beta$  gene rearrangements.

Figure 3

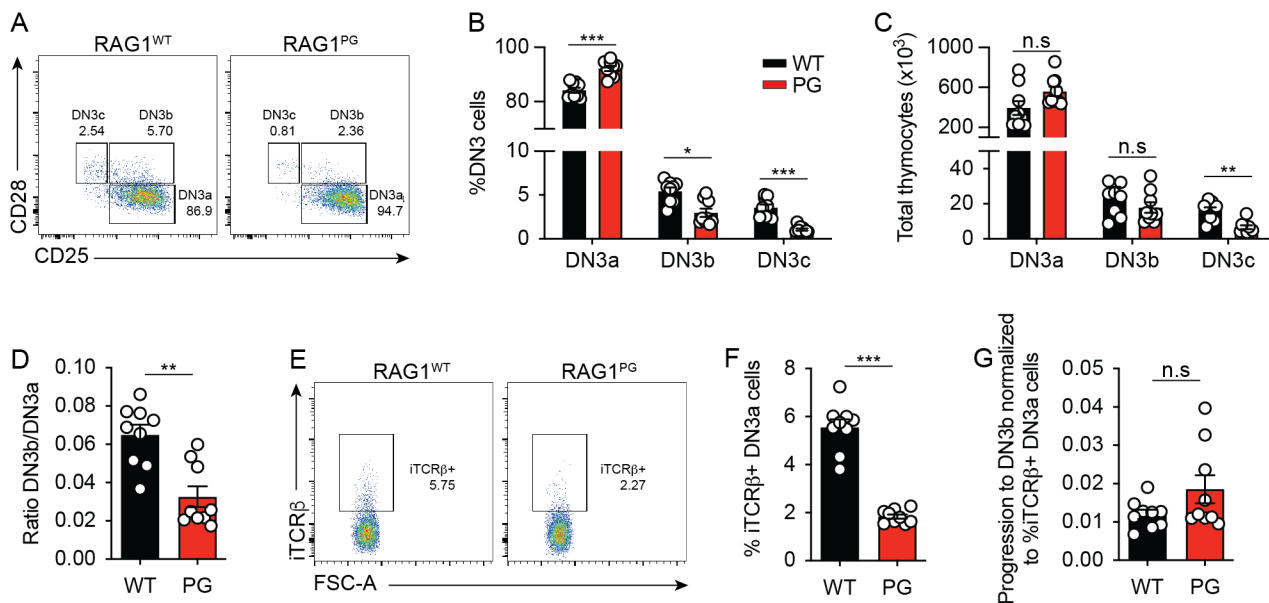

247

248 **Figure 3.** *PG* DN3 thymocytes exhibit normal efficiency of pre-TCR signaled differentiation. (A)

249 Representative flow cytometry plots of DN3a, DN3b, and DN3c stages of thymocyte development

250 showing the frequency of cells at each stage. (B-C) Quantification of percentages (E) or numbers (F) of

251 total DN3 cells in each stage. Shown are all data points and average values +/- SEM from three

252 independent experiments each with three mice of each genotype (n = 9 mice per genotype, analyzed by

253 multiple t tests using the Holm-Sidak method; n.s. p>0.05, \* p<0.05, \*\* p<0.005, \*\*\*\* p<0.00005). (D)

254 Quantification of percentages of DN3a cells that progress into DN3b cells. Shown are all data points and

255 average values +/- SEM from three independent experiments each with three mice of each genotype (n =

256 9 mice per genotype, analyzed by unpaired t-test with Welch's correction; \*\*p<0.005). (E) Representative

257 flow cytometry plots of intracellular TCRβ protein expression in DN3a thymocytes. (F) Quantification of

258 percentages of DN3a cells expressing intracellular TCRβ protein. (G) Ratios comparing the percentages

259 of DN3a cells expressing intracellular TCRβ protein to the percentages of DN3a cells that transition into

260 DN3b cells. (E-J) Shown are all data points and average values +/- SEM from three independent

261 experiments each with three mice of each genotype (n = 9 mice per genotype, analyzed by unpaired t-test

262 with Welch's correction; n.s. p>0.05, \*\*\* p<0.0005).

263

264 **Homozygous Rag1 P326G mutation decreases the efficiencies of positive and negative selection of**  
265 **conventional  $\alpha\beta$  T cells and differentiation of iNKT cells.**

266 In developing B cells, RAG DSBs generated during *Igk* gene assembly signal transcriptional regulation  
267 of proteins that govern antigen receptor signaling, lymphocyte selection, cellular survival, and/or cellular  
268 proliferation (23-25). Considering this and the decreased *Tcra* gene assembly in *PG* DP thymocytes, we  
269 investigated whether any of the thymocyte selection and subsequent differentiation processes that depend  
270 on  $\alpha\beta$  TCR signaling might be impaired in *PG* mice. As a proxy to evaluate positive selection in *PG* mice,  
271 we determined the frequency of  $\alpha\beta$  TCR expressing (TCR $\beta^+$ ) Stage 1 thymocytes that initiate positive  
272 selection as indicated by progression to Stage 2 in *PG* and *WT* mice (Fig. 4 A). By analyzing only  $\alpha\beta$   
273 TCR expressing cells, we circumvent potential effects of decreased *Tcra* gene rearrangements reducing  
274 the fraction of DP thymocytes that express  $\alpha\beta$  TCRs and are subject to selection. This frequency is lower  
275 in *PG* mice (Fig. 4 B), consistent with modestly less efficient positive selection of  $\alpha\beta$  TCR expressing DP  
276 thymocytes upon homozygous Rag1<sup>P326G</sup> mutation. Yet, we note that this is an imperfect means to quantify  
277 positive selection because it cannot account for possible differences in progression through subsequent  
278 stages or cellular fate decisions from specific TCR/pMHC interactions. Thus, we also quantified numbers  
279 of cells at each of the four stages of positive selection, finding fewer cells at each stage in *PG* mice relative  
280 to *WT* mice (Fig. 4 C). Importantly, there is a greater decrease of cellularity in stage 2 (1.71x) as compared  
281 to stage 1 (1.25x), indicating fewer cells are moving from stage 1 to stage 2 in *PG* mice. Finally, we  
282 quantified CD69 expression and the ratio of CD69 to TCR $\beta$  expression at each stage as CD69 upregulation  
283 correlates directly with  $\alpha\beta$  TCR signaling strength. Although we observed no difference of absolute levels  
284 of CD69 expression, *PG* mice have decreased CD69 expression relative to TCR $\beta$  expression in stage 2  
285 thymocytes that are initiating positively selection (Fig. 4 D). Collectively, these analyses indicate that  $\alpha\beta$   
286 TCR signaled upregulation of CD69 and positive selection is less efficient in *PG* mice. However, they do

287 not distinguish between potential effects from altered primary repertoires of *Tcrb* and *Tera* genes versus  
288 diminished intrinsic  $\alpha\beta$  TCR signaling capacity. They also do not address the possibility that the <10%  
289 reduction in numbers of total thymocytes in *PG* mice alters thymic architecture in a manner that decreases  
290 the fraction of DP cells that engage pMHC presented by TECs or DCs.

291



292

Figure 4

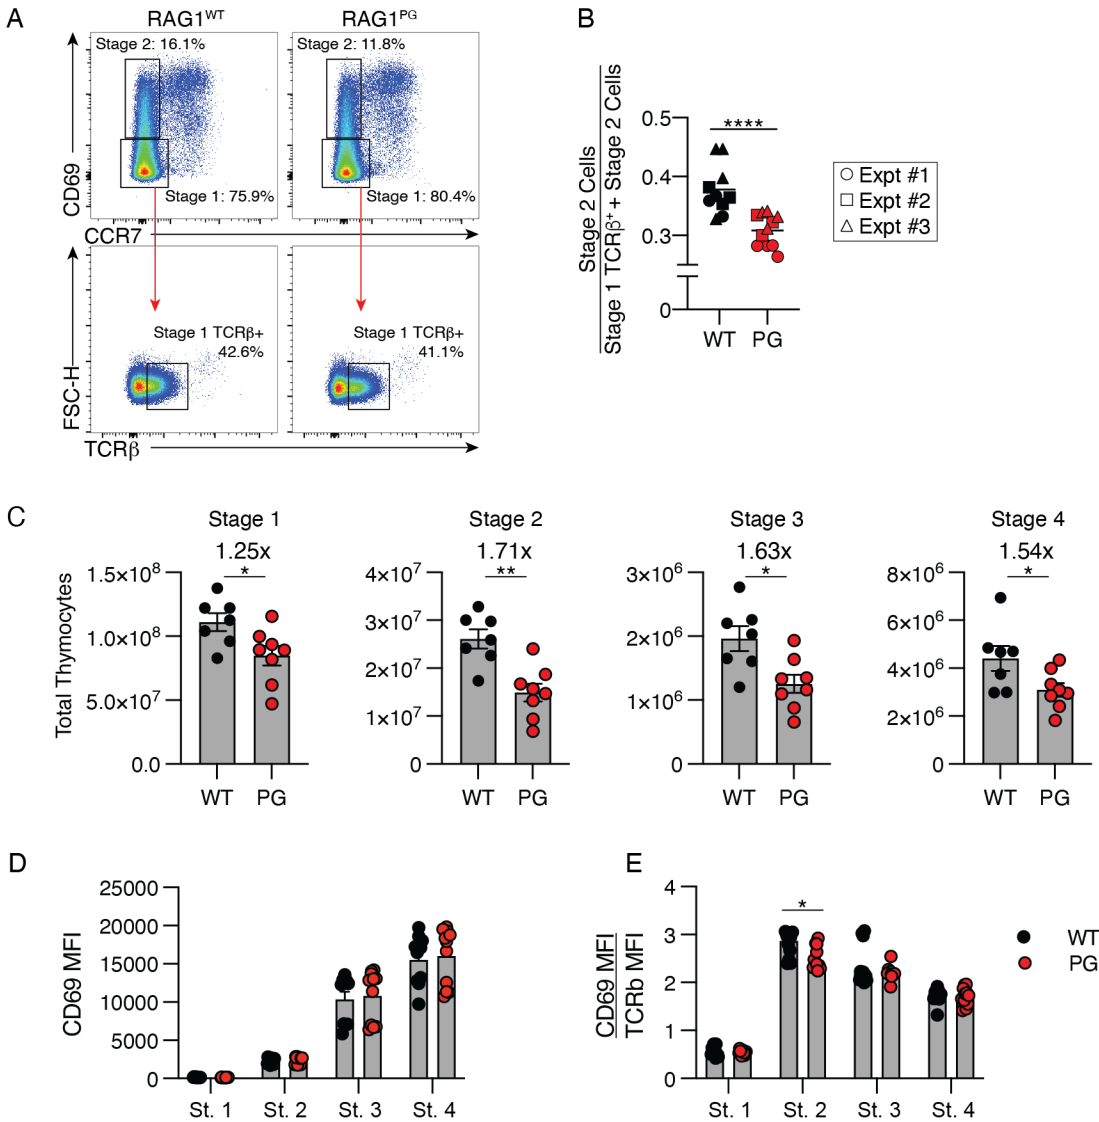

293

294 **Figure 4.** *PG* mice exhibit impaired positive selection. **(A)** Gating strategy for measuring positive  
 295 selection of thymocytes showing Stage 1 and 2 gates. The TCR $\beta$ <sup>+</sup> gate was set using wild-type thymocytes  
 296 by gating on live, singlet, CD4<sup>+</sup>CD8<sup>+</sup> cells, preparing a histogram showing TCR $\beta$  staining on cells within  
 297 this gate, and gating on the shoulder that represents cells expressing TCR $\beta$ . **(B)** Quantification of the ratio  
 298 of the number of Stage 2 cells to the total number of Stage 1 and 2 cells. Shown are all data points and  
 299 global mean from three independent experiments (n = 10-11 mice per genotype, 2-way ANOVA indicating  
 300 effect of genotype). **(C)** Quantification of numbers of cells in each stage of positive selection. Dots

301 indicate individual mice. Data pooled from 2-independent experiments (n = 7-8 mice per genotype, bars  
302 indicate mean +/- SEM analyzed by Man-Whitney test). **(D)** Quantification of CD69 expression alone and  
303 in comparison to TCR $\beta$  expression on cells at each stage of positive selection. Dots indicate individual  
304 mice. Data pooled from 2-independent experiments (n = 8 mice per genotype, bars indicate mean +/- SEM.  
305 Analysed by 2-way ANOVA and Sidak multiple comparison post-test) For all graphs in figure: n.s.  
306 p>0.05; \* p<0.05, \*\*p<0.01, \*\*\* p<0.001, \*\*\*\* p<0.0001.

307

308

309 To determine whether the Rag1<sup>P326G</sup> mutation impairs negative selection, we utilized a naturally occurring  
310 system of superantigen-mediated negative selection (26). Laboratory mice express remnant mouse  
311 mammary tumor virus (MMTV) retroviral products. Some of these products can bind the MHCII I-E<sup>d</sup>  
312 protein and certain V $\beta$  peptides, including V $\beta$ 5.1-5.2 (encoded by *Trbv12.1-12.2*) and V $\beta$ 12 (encoded by  
313 *Trbv15*), to trigger exceptionally strong  $\alpha\beta$  TCR signaling that promotes negative selection (26, 27). Our  
314 sequencing analysis of *Tcrb* gene rearrangements in DN3 thymocytes shows equivalent representation of  
315 *Trbv12.1*, *Trbv12.2*, and *Trbv15* in the primary V $\beta$  repertoire (Fig. 2 C). Considering that V $\beta$  repertoire  
316 remains constant during DN-to-DP thymocyte development (28), assaying superantigen-mediated  
317 deletion of V $\beta$ 5.1-5.2 or V $\beta$ 12 accounts for differences of J $\beta$  repertoire of *Tcrb* genes assembled in *WT*  
318 and *PG* mice. Moreover, the reduced level and altered repertoire of *Tcra* genes assembled in DP cells of  
319 *PG* mice would not influence superantigen-mediated deletion of thymocytes expressing  $\alpha\beta$  TCRs with  
320 specific V $\beta$  peptides. BALB/c, but not C57BL/6, strain mice express I-E<sup>d</sup> protein. As a result, thymocytes  
321 expressing V $\beta$ 5.1-5.2 or V $\beta$ 12 are efficiently deleted in BALB/c, but not B6, genetic backgrounds. We  
322 bred BALB/c background *Rag1*<sup>-/-</sup> mice with C57BL/6 background *Rag1* *PG* or *WT* mice to generate and  
323 analyze *Rag1*<sup>PG/-</sup> and *Rag1*<sup>WT/-</sup> mice expressing I-E<sup>d</sup> protein. To ascertain whether these mice exhibit a  
324 difference in superantigen-mediated negative selection, we measured the frequencies of DP thymocytes  
325 that have not completed  $\alpha\beta$  TCR selection and post-selection SP thymocytes expressing I-E<sup>d</sup>:MMTV-  
326 reactive (V $\beta$ 5<sup>+</sup> or V $\beta$ 12<sup>+</sup>) or -unreactive (V $\beta$ 6<sup>+</sup>, V $\beta$ 8<sup>+</sup>, or V $\beta$ 14<sup>+</sup> encoded by *Trbv19*, *Trbv13.1-13.3*, or  
327 *Trbv31*, respectively)  $\alpha\beta$  TCRs (Fig. 5, A-F). We calculated the percentages of DP and SP thymocytes  
328 expressing each V $\beta$  peptide (Fig. 5, B-F). Our analysis indicates that greater fractions of I-E<sup>d</sup>:MMTV-  
329 reactive thymocytes proceed through DP-to-SP development in *Rag1*<sup>PG/-</sup> mice as compared to *Rag1*<sup>WT/-</sup>  
330 mice (Fig. 5, B, C, and G), consistent with impaired negative selection of highly self-reactive thymocytes.  
331 In contrast, we found that the types of un-reactive thymocytes assayed develop equivalently in each  
332 genotype (Fig. 5, D -G). While the latter finding does not reflect less efficient positive selection, we note

333 that this experiment monitors a small subset of thymocytes expressing specific V $\beta$  peptides and thus is  
334 not as sensitive as determining the frequencies of overall DP thymocytes that initiate positive selection.  
335 Regardless, the data indicate that *PG* mice exhibit less efficient deletion of thymocytes that express  
336  $\alpha\beta$  TCRs containing superantigen-reactive V $\beta$  peptides. As V $\beta$  repertoire is normal in *PG* mice (Fig. 2C),  
337 plausible explanations for this impaired form of negative selection include that intrinsic  $\alpha\beta$  TCR signaling  
338 capacity is dampened and/or reduced numbers of DP thymocytes prevents some from contacting or  
339 maintaining interaction with superantigen.

340

Figure 5

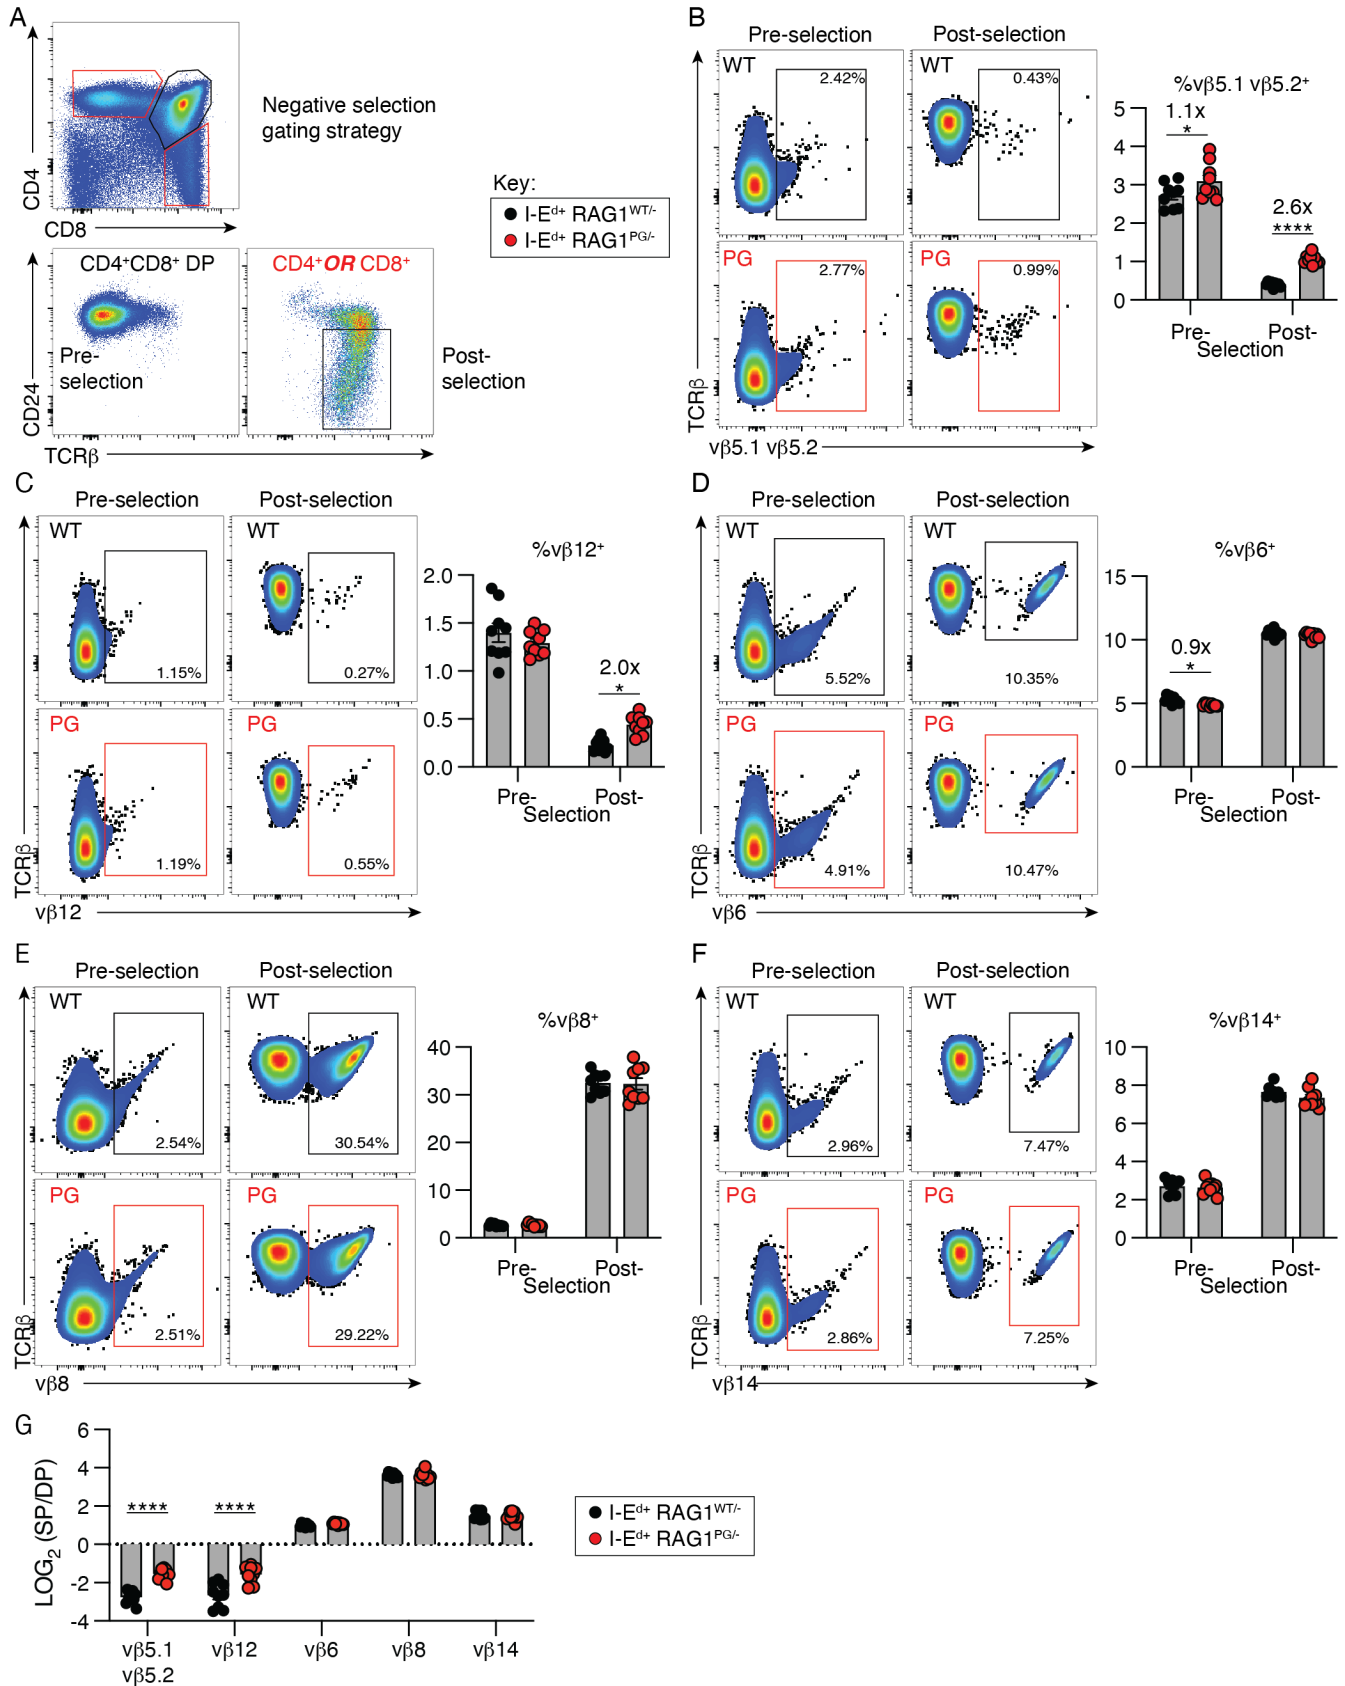

342 **Figure 5.** *PG* mice exhibit impaired superantigen-mediated negative selection. **(A)** Gating strategy form  
343 measuring negative selection of specific  $V\beta^+$  thymocytes in F1 progeny of C57BL/6 background *WT* or  
344 *PG* mice crossed with BALB/c background *Rag1*<sup>-/-</sup> mice. Pre-gated on live singlets. **(B-F)** Representative  
345 analyses and quantification of the indicated  $V\beta^+$  cells in DP thymocytes that have not completed  $\alpha\beta$  TCR  
346 selection or post-selection SP thymocytes. **(G)** Data from B-F displayed as  $\text{LOG}_2$  ratio of respective  
347 percent  $V\beta^+$  cells in SP versus DP gates. Shown are all data points and average  $\pm$  SEM from two  
348 independent experiments (n = 9 mice per genotype 2-way ANOVA with Sidak multiple comparison post-  
349 test). For any significantly different combinations, fold change is indicated. For all graphs in figure: \*  
350  $p < 0.05$ , \*\*\*\*  $p < 0.0001$ .

351

352

353 Finally, to ascertain potential effects of Rag1<sup>P326G</sup> mutation on agonist selection, we focused on assaying  
354 iNKT cell development because their limited TCR diversity and specificity facilitates their identification  
355 and assays of their selection and differentiation subsequent to V(D)J recombination. This lineage develops  
356 when TCRs containing an invariant V $\alpha$ 14-J $\alpha$ 18 TCR $\alpha$  chain and TCR $\beta$  chains with V $\beta$  regions encoded  
357 by *Trbv1*, *Trbv13.1-13.3*, or *Trbv19* bind lipids presented by the MHC-like CD1d protein on different DP  
358 thymocytes (29-31). These interactions induce strong TCR signals that mediate agonist selection of DP  
359 cells into  $\alpha\beta$  TCR-expressing iNKT common progenitor (Stage 0) cells and their differentiation into iNKT  
360 precursor (Stage 1) cells and then into different mature effector subsets (iNKT1, iNKT2, or iNKT17)(32).  
361 We first used a CD1d tetramer loaded with PBS57, an analogue of the  $\alpha$ -galactosylceramide ( $\alpha$ -GalCer)  
362 glycolipid, to identify  $\alpha$ -GalCer-reactive iNKT lineage cells in *WT* and *PG* mice. Unloaded “empty”  
363 tetramer showed little to no staining in any of the samples (exemplified in Fig. 6A). As compared to *WT*  
364 mice, *PG* mice had fewer absolute numbers of thymic  $\alpha$ -GalCer-reactive iNKT lineage cells (Fig. 6, A  
365 and B). While *PG* mice also tended to have fewer splenic iNKT cells (Fig. 6, A and B), this difference  
366 did not reach statistical significance ( $p=0.06$ ) with the numbers of mice analyzed. We used Taqman PCR  
367 to show that the levels of V $\alpha$ 14-to-J $\alpha$ 18 rearrangements in sorted DP thymocytes of *PG* mice are  $\sim 10\%$   
368 relative to *WT* mice (Fig. 6 C), which is consistent with reduced generation of V $\alpha$ 14-J $\alpha$ 18 TCR $\alpha$  chains  
369 contributing to the lower numbers of thymic  $\alpha$ -GalCer-reactive iNKT cells in *PG* mice. However, we  
370 observed no significant differences in the numbers of PBS57 loaded tetramer-staining cells at both Stage  
371 0 (CD24<sup>hi</sup>CD44<sup>-</sup>NK1.1<sup>-</sup>) or Stage 1 (CD24<sup>lo</sup>CD44<sup>-</sup>NK1.1<sup>-</sup>) in *WT* and *PG* mice (Fig. 6, D and E),  
372 indicating that the reduction of V $\alpha$ 14-to-J $\alpha$ 18 rearrangements in *PG* DP thymocytes does not translate  
373 into decreased agonist selection of  $\alpha$ -GalCer-reactive iNKT lineage cells. In contrast, we observed that  
374 *PG* mice have lower numbers of NKT2/17 (CD24<sup>lo</sup>CD44<sup>+</sup>NK1.1<sup>-</sup>) and NKT1 (CD24<sup>lo</sup>CD44<sup>+</sup>NK1.1<sup>+</sup>)  
375 effector iNKT cells that develop from Stage 1 precursor cells (Fig. 6, D and E). Notably, the median  
376 fluorescence intensities of TCR $\beta$  expression and PBS57/CD1d tetramer binding of thymocytes was

377 similar or slightly higher in *PG* mice relative to *WT* mice (Fig. 6 A, data not shown), indicating that  $\alpha$ -  
378 GalCer-reactive iNKT cells of *PG* mice have a normal range of intrinsic affinity for this lipid presented  
379 by CD1d. We also analyzed iNKT populations in the competitive setting of mixed bone marrow chimeras  
380 comparing mice that received donor bone marrow that was either 100% *PG* or at 1:1 mix of *PG* and *WT*  
381 marrow. The *WT* cells in the mixed chimeras outcompeted the *PG* cells starting at Stage 1 with more  
382 pronounced effects in the terminally differentiated effector iNKT cell types (Supplemental Figure 1). The  
383 same effect can be seen from the few remnant *WT* cells in the 100% *PG* recipient mice (Supplemental  
384 Figure 1, C). These data indicate that there is a cell-intrinsic loss of fitness in iNKT cell development in  
385 *PG* cells as they progress from Stage 0 to Stage 1 that is not revealed in the non-competitive environment.  
386 Because the fitness of the *PG* iNKT Stage 0 and 1 cells is poor in the 1:1 mixed environment, it is difficult  
387 to assess cell-intrinsic iNKT differentiation in this setting. Yet, the few remnant *WT* cells in the 100% *PG*  
388 recipient mice continue to incrementally outcompete *PG* cells in both NKT1 and NKT 2/17 differentiation,  
389 demonstrating a cell-intrinsic differentiation defect in this system. The basis for this defect could include  
390 altered  $\alpha\beta$  TCR signaling arising from differences in D $\beta$ -, J $\beta$ -, CDR3 $\beta$ -, or CDR3 $\alpha$ -encoded amino acids,  
391 diminished RAG DSB-signalled changes in expression of proteins that control iNKT cell differentiation,  
392 or both.



Figure 6

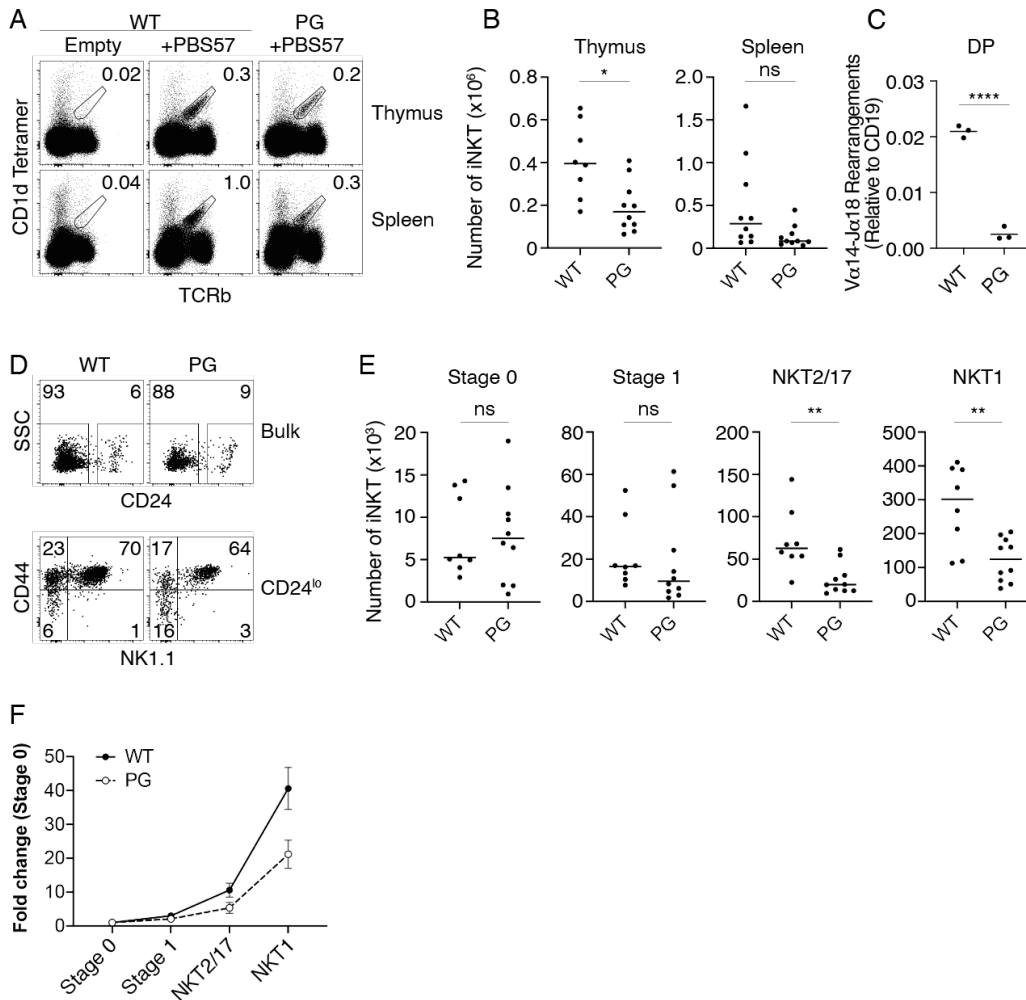

393

394 **Figure 6.** *PG* mice have impaired agonist selection of iNKT cells. **(A-B)** Representative flow cytometry  
 395 plots **(A)** and quantification **(B)** of PBS57/CD1d tetramer binding iNKT cells in thymuses or spleens.  
 396 Gated on live, singlet lymphocytes. “Empty” denotes unloaded tetramer staining. **(B)** Data from three  
 397 independent experiments with 1-4 mice per group. Mann-Whitney test: \*,  $p=0.01$  (thymus); ns, not  
 398 significant (spleen). **(C)** Taqman PCR quantification of Vα14-Jα18 rearrangements from sorted DP  
 399 thymocytes. The data were generated from three technical replicates of three independent biological  
 400 samples from mice of each genotype. Data are represented as Mean +/- SEM analyzed by an unpaired  
 401 parametric t test with Welch's correction.  $p<0.001$ . **(D-E)** Representative flow cytometry plots and gating  
 402 strategy **(D)** or quantification **(E)** of Stage 0 (CD24<sup>hi</sup> CD44-NK1.1-), Stage 1 (CD44-NK1.1-), NKT2/17  
 403 (CD44+NK1.1-), and NKT1 (CD44+NK1.1+) iNKT cells.

404

405 **Mature  $\alpha\beta$  T cells of homozygous Rag1 P326G mice exhibit normal responses to activation.**

406 RAG endonuclease activity during lymphocyte ontogeny triggers permanent changes in gene expression  
407 that correlate with impaired responses of mature lymphocytes (33). Considering that RAG endonuclease  
408 function is diminished in thymocytes of *PG* mice, we sought to elucidate whether the mature  $\alpha\beta$  T cells  
409 of these animals have normal or altered response to activation. We first conducted *in vitro* analyses. Upon  
410 stimulation with PMA and ionomycin, splenic CD44<sup>hi</sup>  $\alpha\beta$  T cells from *PG* mice produce normal levels of  
411 IFN $\gamma$ , TNF $\alpha$ , IL-2, and IL-17A (Fig. 7 A). These cells also show normal proliferation upon anti-CD3/anti-  
412 CD28 stimulation (Fig. 7 B). Moreover, stimulated CD4<sup>+</sup> and CD8<sup>+</sup>  $\alpha\beta$  T cells of *PG* mice normally  
413 express their canonical transcription factors (Fig. 7, C and D) and cytokines (Fig. 7, E and F) when cultured  
414 in respective skewing conditions. We next monitored  $\alpha\beta$  T cell responses *in vivo* following infection of  
415 mice with an acute strain of lymphocytic choriomeningitis virus (LCMV-Armstrong). We analyzed mice  
416 either seven days later to monitor at the immune response peak or 35 days later to monitor memory cells.  
417 At each timepoint, we detected similar frequencies and numbers of antigen-specific CD8<sup>+</sup>  $\alpha\beta$  T cells that  
418 stain with gp33:H-2Db tetramer in *PG* and *WT* mice (Fig. 7 G), indicating that *PG* mice display normal  
419 numbers and dynamic responses of  $\alpha\beta$  T cells that recognize LCMV-Armstrong. We also observed  
420 equivalent dynamic expression of Tbet, Eomes, KLRG1, and CD127 proteins on  $\alpha\beta$  T cells from *PG* and  
421 *WT* mice (Fig. 7 H), indicating normal contraction of short-lived effector cells (SLECs), and sustained  
422 memory/memory precursor effector cells (MPECs) in *PG* mice. Finally, we detected similar numbers of  
423 antigen specific  $\alpha\beta$  T cells able to respond to the gp33, NP396, or gp61 viral peptides within a peptide re-  
424 stimulation assay (Fig. 7, I and J). Together, these data demonstrate that the mature  $\alpha\beta$  T cells of *PG* mice  
425 have normal responses to activation, in the tested conditions.

Figure 7

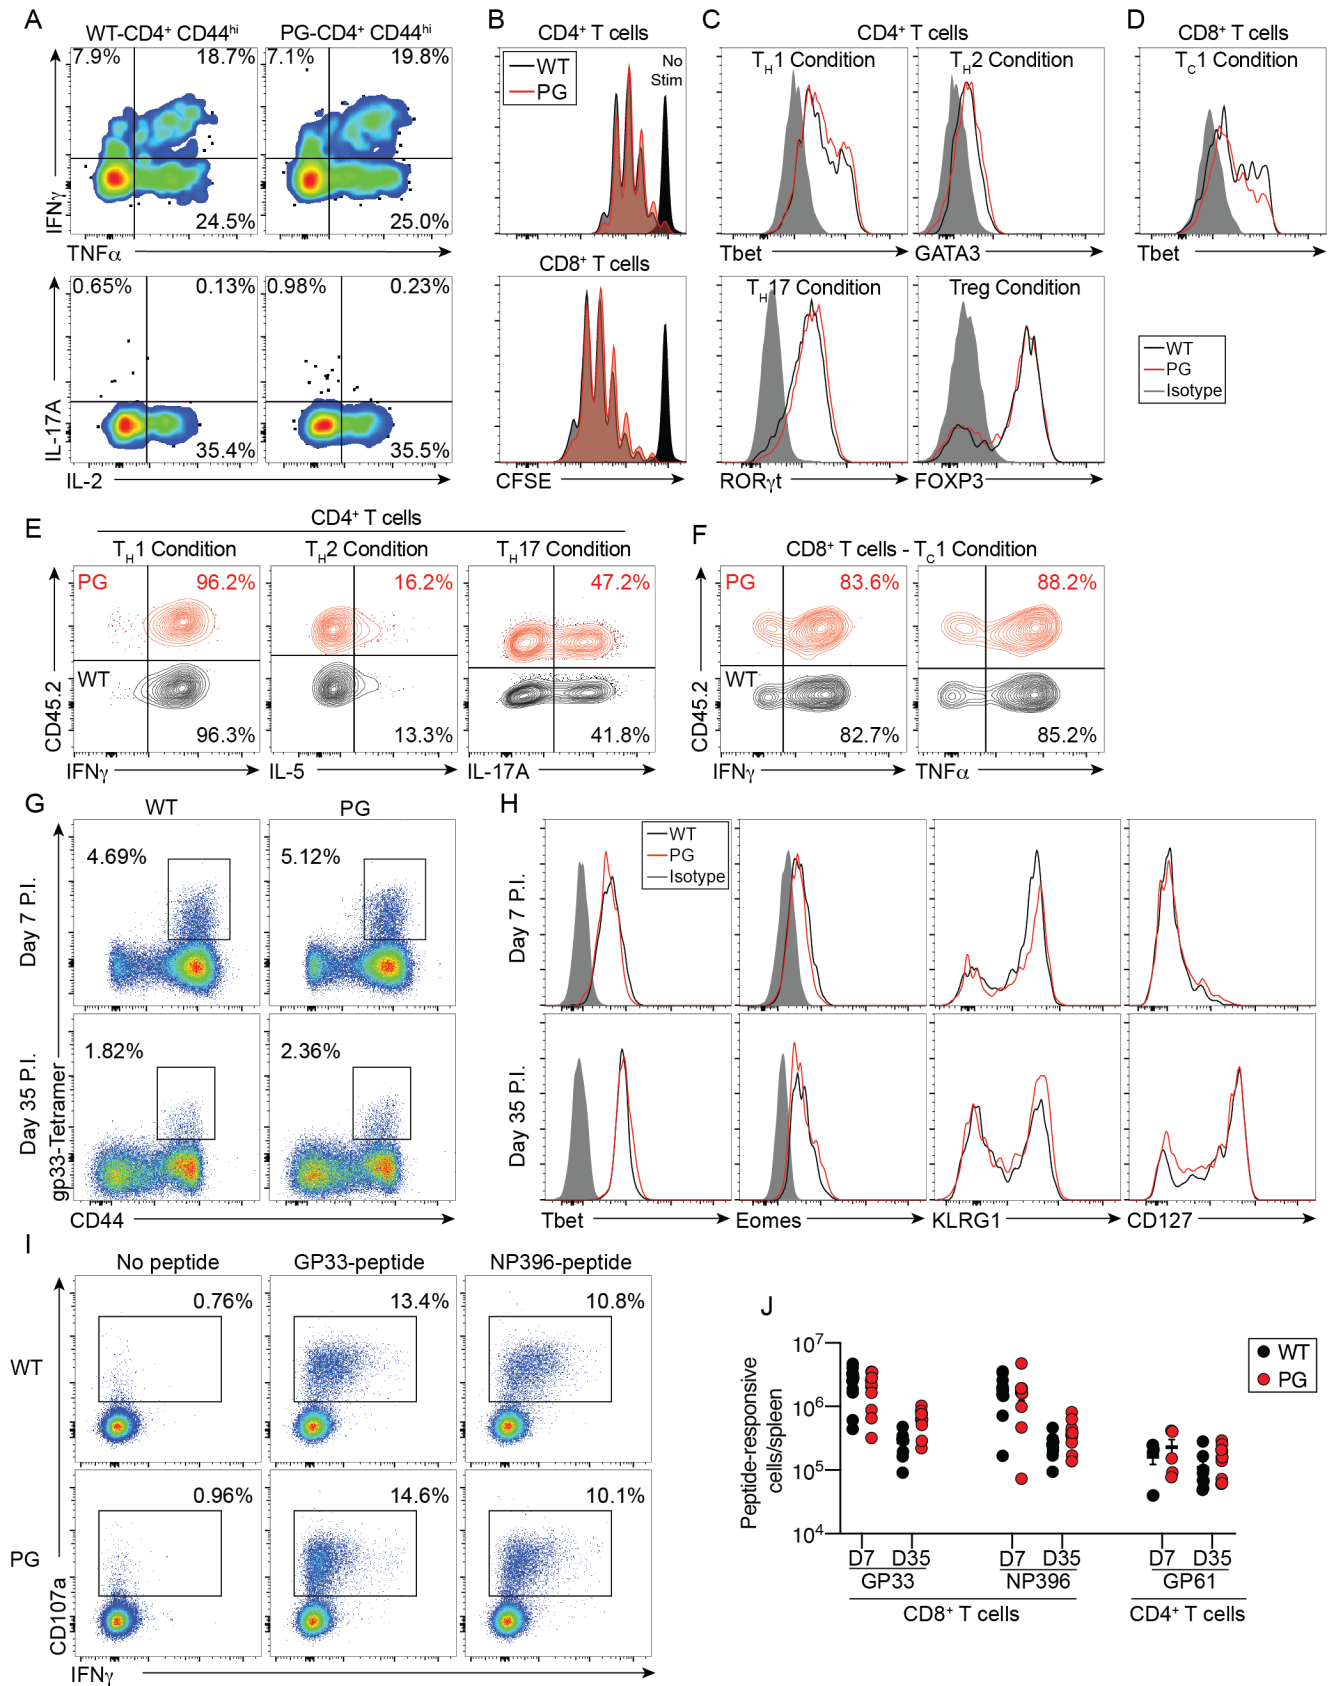

427 **Figure 7.** Mature  $\alpha\beta$  T cells of PG mice exhibit normal immune response. **(A)** Representative plot of  
428 cytokine expression on CD4<sup>+</sup>CD44<sup>hi</sup>  $\alpha\beta$  T cells following *ex vivo* stimulation of splenocytes with PMA  
429 and ionomycin. **(B-F)** Representative analyses of naïve splenic CD4<sup>+</sup> or CD8<sup>+</sup> T cells after *ex vivo*  
430 simulation with anti-CD3/anti-CD28 antibodies and additional antibodies to skew towards indicated  
431 lineages. Shown is CFSE incorporation (B) or expression of relevant transcription factors (C, D) or  
432 cytokines (E, F). **(G, H)** Representative flow data showing (G) frequencies of splenic  $\alpha\beta$  T cells that stain  
433 with the gp33:H-2Db tetramer or (H) express indicated cytokines after LCMV infection of mice. Data are  
434 representative of two independent experiments with at least four mice of each genotype. **(I, J)**  
435 Representative plots (J) and (I) quantification of antigen-specific  $\alpha\beta$  T cells able to respond to indicated  
436 viral peptides within a peptide re-stimulation assay. (A-F) Data are representative of two independent  
437 experiments. (G-J) Data are combined from four independent experiments (two D7 and two D35  
438 timepoints) with 8-11 mice of each genotype per time-point.

439

440

441 **Mature  $\alpha\beta$  T cells of homozygous  $Rag1^{P326G}$  mice exhibit increased autoimmune potential.**

442 Within a setting of less efficient negative selection as with homozygous  $Rag1^{P326G}$  mutation, an increased  
443 predisposition to  $\alpha\beta$  T cell mediated autoimmunity would be expected. However, we did not observe overt  
444 autoimmune symptoms within  $PG$  mice, possibly because mice of the C57BL/6 background are resistant  
445 to spontaneous autoimmune diseases (34, 35). Thus, to investigate whether the  $Rag1^{P326G}$  mutation can  
446 predispose to autoimmunity, we utilized an induced model of autoimmune colitis in C57BL/6 mice.

447

448 The colitis model involves transferring into  $Rag1^{-/-}$  mice naïve  $CD4^{+}$  effector  $\alpha\beta$  T cells, which become  
449 activated and trigger cytokine-driven colitis and associated systemic pathologies including weight loss  
450 due to the absence of Tregs (36-38). We observed accelerated wasting of  $Rag1^{-/-}$  mice receiving  $PG$  cells  
451 relative to  $WT$  cells or no transfer (Fig. 8 A). We analyzed mice at eight weeks after transfer. As compared  
452 to  $WT$  recipients, we detected greater numbers of total splenic  $CD4^{+}$  T cells and of  $CD4^{+}$  T cells producing  
453  $IFN\gamma$ ,  $TNF\alpha$ , and/or GM-CSF cytokines (Fig. 8, B and C). Colon length is used as a measure of disease  
454 severity in this model, and mice receiving transferred  $PG$  cells had shorter colons relative to mice  
455 receiving  $WT$  cells, consistent with worse disease caused by  $PG$  cells (Fig. 8 D). Histologic assessment  
456 and scoring in this colitis model has been formalized (38), and can be grossly broken down into scores  
457 related to inflammatory cell infiltration and scores related to injury of tissue architecture. There was no  
458 statistical difference in inflammation scores between mice receiving  $WT$  and  $PG$  cells. However, tissue  
459 damage scores were higher in mice receiving  $PG$  cells, suggesting that, on a per cell basis,  $PG$  cells induce  
460 greater tissue injury in this model (Fig. 8, E-F). Notably, specifically in  $PG$ -transferred animals, we  
461 observed autoimmune pathologies in addition to colitis, including dermatitis, chylous ascites, severe small  
462 intestine enlargement, and neurological distress (Fig. 8 H). Dermatitis was most common and involved  
463 massive inflammatory infiltration and tissue damage (Fig. 8 I). Consistent with more widespread  
464 autoimmune conditions in  $PG$ -transferred mice, we observed significant splenomegaly in these mice (Fig.  
465 8 J). Finally, while not statistically significant, we observed an increased rate of premature death in the

466 mice transferred with *PG* cells compared to *WT* cells (Fig. 8 K), which was especially surprising because  
 467 death is an unexpected outcome in this model. Collectively, the data from this colitis model indicate that  
 468 CD4<sup>+</sup> effector T cells from *PG* mice have greater than normal autoimmune potential.  
 469

Figure 8

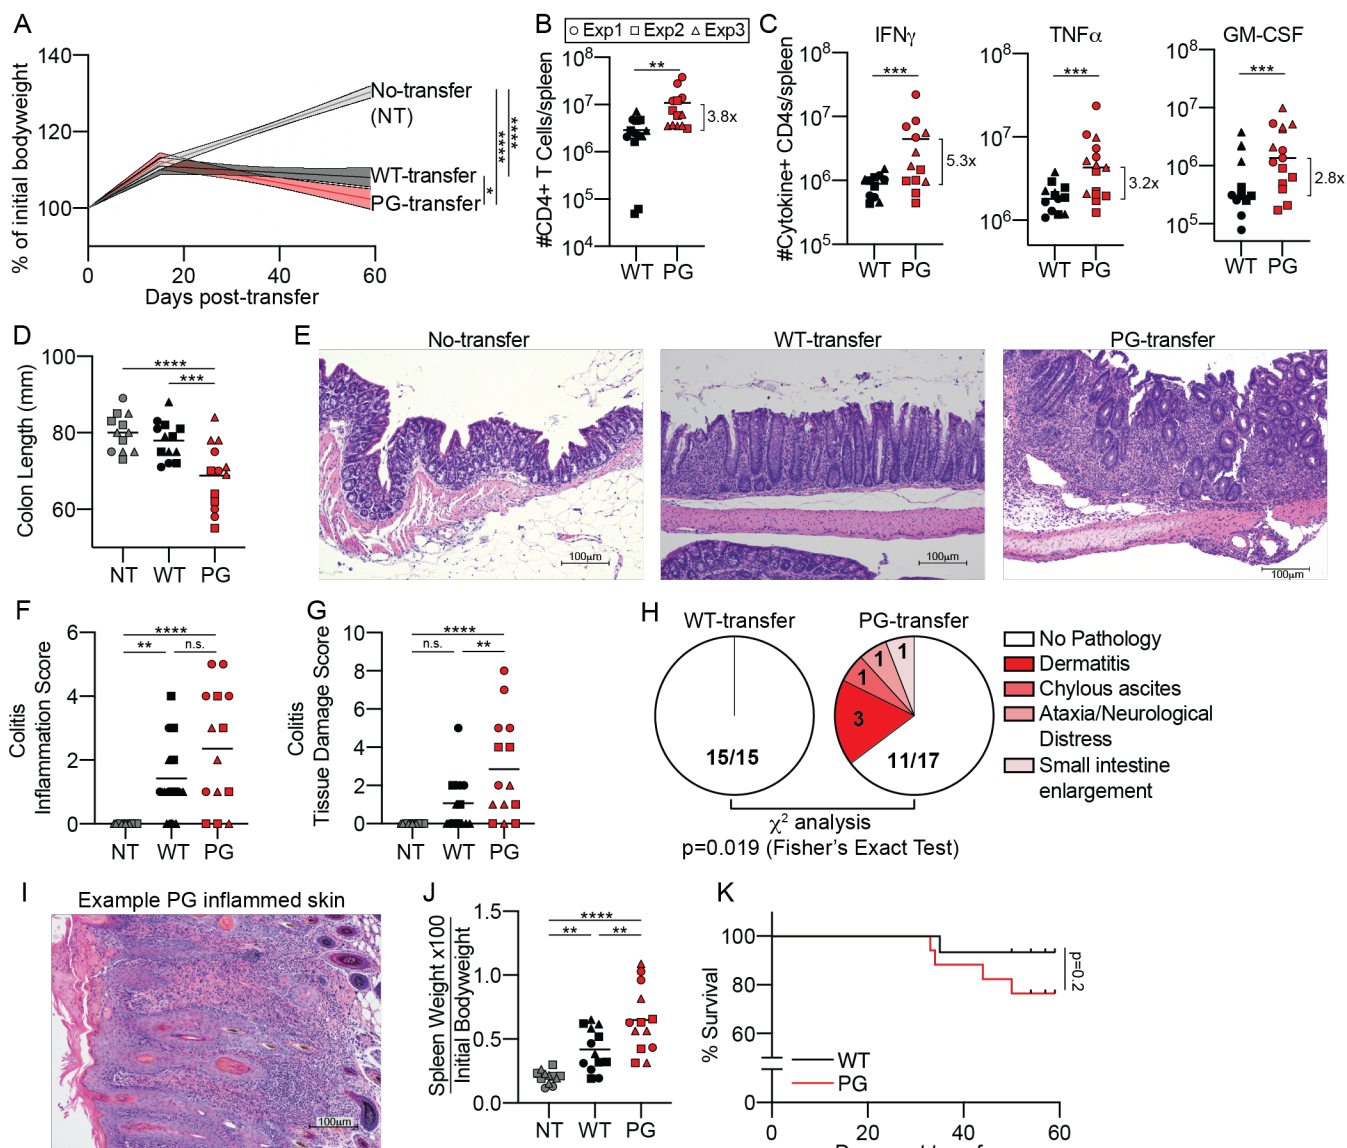

470 **Figure 8.** Mature  $\alpha\beta$  T cells of *PG* mice possess higher than normal autoimmune hazard. **(A)** Graph of  
 471 body weights of *Rag1*<sup>-/-</sup> hosts over time after transfer of *WT* or *PG* CD4<sup>+</sup> T cells or no cells (NT). Data  
 472 combined from three independent experiments with a total of 13-17 mice of each genotype. Lines indicate  
 473 fitted segmented-linear regression lines +/- 95% confidence interval. Day 15 was fixed as the inflection  
 474

475 point. Difference between gradients of second slope was determined by linear regression analysis. **(B)**  
476 Numbers of CD4<sup>+</sup> T cells in spleen eight weeks post-transfer. **(C)** Total number of IFN $\gamma$ , TNF $\alpha$ , and/or  
477 GM-CSF producing cells per spleen. Shown are all data points from three independent experiments with  
478 12-14 mice per group. Bar indicates global mean. Pre-gating on live singlets, CD90.2<sup>+</sup>, CD4<sup>+</sup>, and CD44<sup>+</sup>.  
479 **(D)** Colon length of mice sacrificed at eight weeks post-infection. **(E)** Representative hemotoxylin and  
480 eosin stained colon sections from respective mice at eight weeks post-transfer. 10x magnification. **(F-G)**  
481 Total colitis score as assessed by blinded pathologist. Scored as per previously described guidelines for  
482 the five phenotypes (38): **(F)** Colon inflammation score (contribution of scores for crypt abscesses and  
483 inflammatory cell infiltrate). **(G)** Colon tissue damage score (contribution of scores for crypt architecture,  
484 tissue damage, goblet cell loss). **(H)** Non-colitis pathologies described for mice transferred with *WT* versus  
485 *PG* cells. **(I)** Hemotoxylin and eosin stained skin section from *PG*-transferred mouse with severe  
486 dermatitis at eight weeks post-transfer. 10x magnification. **(J)** Spleen weight at eight weeks post-transfer  
487 normalized to total mouse bodyweight prior to transfer. **(K)** Survival curves of mice transferred with *WT*  
488 or *PG* cells. Data combined from three independent experiments. Statistical analysis = Log-rank Mantel-  
489 Cox test. Overall: 0/13 NT mice died, 1/15 *WT*-transferred mice died, and 4/17 *PG*-transferred mice died.  
490 **(B, C, F, G, and J)** Shown are all data points from three independent experiments, 12-14 mice per group.  
491 Experiment indicated by shape of data point. Bar indicates global mean. Analyzed by 2-way ANOVA  
492 with Tukey HSD post-test. n.s.  $p > 0.05$ ; \*  $p < 0.05$ , \*\*  $p < 0.01$ , \*\*\*  $p < 0.001$ , \*\*\*\*  $p < 0.0001$   
493

494

## Discussion

495

496 Our analysis of *PG* mice demonstrates that the RAG1 RING domain stimulates V(D)J recombination of  
497 endogenous TCR loci and resulting  $\alpha\beta$  T cell development *in vivo*. The decreased V(D)J recombination  
498 activity in *PG* mice manifests as lower levels of  $V\beta$ -to-DJ $\beta$  and  $V\alpha$ -to-J $\alpha$  rearrangements within DN and  
499 DP thymocytes, respectively. These reduced  $V\beta$  rearrangements diminish overall progression of the DN3  
500 thymocyte population to the DN4 and then DP stage by lowering the frequency of DN3 cells that create  
501 TCR $\beta$  protein. Similarly, reduced  $V\alpha$  rearrangements likely contribute to less efficient overall positive  
502 selection of the DP thymocyte population by lowering the frequency of DP cells that establish  $\alpha\beta$  TCRs.  
503 Moreover, the 10% lower numbers of DP thymocytes in *PG* mice resulting from decreased expansion of  
504 the DN population could impair positive selection by reducing engagement of  $\alpha\beta$  TCRs on DP cells with  
505 pMHC on TECs or DCs. Our data align with the recent report that Rag1<sup>P326G</sup> mutation in mice diminishes  
506 V(D)J recombination of IgH and Ig $\kappa$  loci and the B cell developmental transitions that depend on these  
507 rearrangements by reducing RAG cleavage (19). The Rag1<sup>P326G</sup> mutation might intrinsically decrease  
508 RAG endonuclease activity by altering Rag1 protein structure and/or impairing Rag1-mediated  
509 autoubiquitylation of RAG complexes (10, 11, 15). As the RAG1 RING domain promotes ubiquitylation  
510 of histone H3 proteins (12-14), our data raise the possibility that the RAG1 ubiquitin ligase might stimulate  
511 accessibility of chromatin over TCR and Ig loci to enhance RAG binding, cleavage, or both. Moreover,  
512 because RAG1 RING domain mutations that impair histone H3 ubiquitylation result in accumulation of  
513 coding ends and signal ends in episomal substrates (13), less efficient V(D)J coding join formation might  
514 diminish TCR and Ig gene rearrangements and resulting lymphocyte differentiation in *PG* mice.  
515 Elucidating the precise molecular mechanisms by which the RAG1 RING domain promotes V(D)J  
516 recombination *in vivo* requires biochemical studies of RAG complexes in *WT* and *PG* cells, epigenetic



517 analyses of TCR and Ig loci in mice that express endonuclease-inactivated RAG complexes with or  
518 without Rag1<sup>P326G</sup> mutation, and characterization of the ubiquitylated proteome in all four cell types.

519

520 Our analysis of *PG* mice also reveals that the RAG1 RING domain shapes primary TCR gene repertoires  
521 and might thereby regulate positive selection and negative selection of conventional  $\alpha\beta$  T cells. The amino  
522 acids encoded by rearranged gene segments or *de novo* CDR3 nucleotides influence antigen recognition,  
523 signaling, and selection of  $\alpha\beta$  TCRs. Although we did not analyze CDR3 nucleotides, our data indicate  
524 differences in utilization of D $\beta$  and J $\beta$  segments within V $\beta$ -to-DJ $\beta$  rearrangements and V $\alpha$  and J $\alpha$   
525 segments within V $\alpha$ -to-J $\alpha$  rearrangements between *WT* and *PG* mice. The altered utilization of TCR $\beta$   
526 and/or TCR $\alpha$  gene segments in V(D)J rearrangements of *PG* mice might create a primary TCR repertoire  
527 that overall is less efficient at promoting positive selection. Moreover, the altered usage of TCR $\beta$  and/or  
528 TCR $\alpha$  gene segments in *PG* mice could produce a TCR repertoire with a greater than normal frequency  
529 of highly selfreactive receptors that escapes negative selection. Decreased RAG endonuclease activity  
530 from Rag1<sup>P326G</sup> mutation likely reduces the utilization of D $\beta$ 2 and 3'J $\alpha$ s by lowering the frequency of V  
531 recombination to these gene segments after V recombination to D $\beta$ 1 or 5'J $\alpha$ s. One prediction of impaired  
532 RAG cleavage activity is elevated usage of gene segments with stronger RAG-targeting recombination  
533 signal sequence (RSS) elements (20). This is the case for V $\beta$  usage in mice with profoundly low RAG  
534 endonuclease activity caused by a deletion of the RING domain and all more N-terminal residues (21).  
535 The J $\beta$ 2.5 gene segment has a stronger RSS than J $\beta$ 2.2 (39). Considering that J $\beta$ 2.5 usage increases and  
536 J $\beta$ 2.2 usage remains normal in TCR $\beta$  gene rearrangements of *PG* mice, Rag1<sup>P326G</sup> mutation likely alters  
537 J $\beta$  utilization by means other than reducing RAG endonuclease activity. The mutation could prevent the  
538 RAG1 ubiquitin ligase from promoting accessibility of some J $\beta$  RSSs, destabilize snynaptic complexes  
539 based on distinct properties of participating J $\beta$  RSSs, or both. The same approach needed to elucidate how

540 the RAG1 RING domain promotes V(D)J recombination *in vivo* would provide mechanistic insights into  
541 how it also shapes primary antigen receptor gene repertoires.

542

543 Although further experimentation is required to better understand how the RAG1 RING domain regulates  
544 V(D)J recombination, any discussion of  $\alpha\beta$  TCR selection and resultant differentiation of DP thymocytes  
545 would be incomplete without consideration of a possibilities that the RAG1 RING domain regulates these  
546 processes independent of assembling TCR genes. The impaired superantigen-mediated negative selection  
547 of conventional  $\alpha\beta$  T cells and differentiation of iNKT lineage cells in *PG* mice suggest potential functions  
548 of the RAG1 RING domain beyond stimulating and shaping TCR gene rearrangements. The molecular  
549 basis for superantigen-mediated negative selection is that these antigens interact simultaneously with  
550 MHC proteins on TECs and particular V $\beta$  peptides on DP thymocytes to illicit very strong TCR signaling  
551 that triggers apoptosis. To our knowledge, there is no evidence that D $\beta$ -, J $\beta$ -, CDR3 $\beta$ -, V $\alpha$ , J $\alpha$ , or CDR3 $\alpha$ -  
552 encoded amino acids influence superantigen-directed negative selection. Thus, as V $\beta$  usage within V $\beta$ -to-  
553 DJ $\beta$  rearrangements is normal in *PG* mice, the altered D $\beta$ , J $\beta$ , V $\alpha$ , and J $\alpha$  usage should not impair  
554 superantigen-driven negative selection of DP thymocytes that express relevant V $\beta$  peptides within their  
555  $\alpha\beta$  TCRs. How iNKT cell subsets develop from agonist-selected iNKT progenitor cells remains  
556 incompletely understood. A recent study in mice expressing  $\alpha\beta$  TCRs from a single pre-assembled V $\alpha$ 14-  
557 J $\alpha$ 18 rearrangement formulated a model that iNKT cell development is a two step process where the first  
558 step involves transient uniform TCR signaling that drives agonist selection of DP thymocytes into iNKT  
559 common precursors and the second step involves antigen/TCR-independent differentiation of different  
560 mature effector subset through differential gene expression (40). However, this study did not investigate  
561 the effects of TCR signaling strength on differentiation of iNKT precursor cells. Prior work that the  
562 development of NKT2 and NKT17 but not NKT1 cells is impaired by a hypomorphic mutation of the  
563 Zap70 TCR signaling protein that weakens TCR signaling supports the notion that strength of TCR

564 signaling influences iNKT cell differentiation (40). Although TCR $\beta$  amino acids encoded by J $\beta$  segments  
565 and CDR3 $\beta$  nucleotides influence  $\alpha\beta$  TCR specificity of iNKT cells (41), it is hard to explain how the minor  
566 changes in D $\beta$  and J $\beta$  usage in *PG* mice would substantially alter TCR signaling to impair the generation  
567 of iNKT subtypes from iNKT precursor cells.

568

569 We envision two not-mutually exclusive possibilities that account for the impaired superantigen-mediated  
570 negative selection of conventional  $\alpha\beta$  T cells and differentiation of NKT precursor cells in *PG* mice. One  
571 is that the 10% reduction in DP thymocyte numbers decreases frequencies or durations of  $\alpha\beta$  TCR contacts  
572 with pMHC on other thymic cells or CD1d/lipid complexes on other DP cells, causing weaker or otherwise  
573 different TCR signaling. The second possibility is that Rag1<sup>P326G</sup> mutation modifies the expression and/or  
574 activities of proteins in DP thymocytes and derivative iNKT precursor cells. To explore this latter scenario,  
575 we quantified Zap70 expression because reduced Zap70 protein levels and/or activity impairs positive and  
576 negative selection (42-44), as well as iNKT cell differentiation (45, 46). We detected lower levels of Zap70  
577 protein but not mRNA in DP cells of *PG* mice at each of the four stages of  $\alpha\beta$  TCR-signaled positive  
578 selection as defined by CD69 and CCR7 protein expression (Supplemental Figure 3). Zap70 proteins  
579 levels are normal in splenic  $\alpha\beta$  T cells of *PG* mice, correlating with a time point when *Rag1* is not  
580 expressed and therefore should not be able to directly influence protein levels (Supplemental Figure 3).  
581 We did not measure Zap70 expression in iNKT lineage cells. The decreased Zap70 expression in DP  
582 thymocytes might contribute to the impaired positive selection and superantigen-mediated negative  
583 selection of *PG* mice. It also could impact generation of the NKT2/17 cell population. Furthermore, it  
584 could contribute to relative lack of fitness in of *PG* iNKT cells progressing from Stage 0 to Stage 1 when  
585 competing with wild type cells. Independent of whether these Zap70 differences are causative of the  
586 observed altered negative selection and NKT differentiation in *PG* mice, reduced Zap70 expression  
587 demonstrates proof-of-concept that the Rag1<sup>P326G</sup> mutation alters protein expression in developing  $\alpha\beta$  T

588 cells as suggested in our second hypothesis above. RAG DSBs induced in pre-B cells signal temporal  
589 changes in gene transcription to modulate expression of proteins including transcription factors that  
590 transcriptionally control expression of other proteins (23-25). Likewise, RAG DSBs generated in  
591 lymphoid progenitor cells cause heritable changes in gene transcription that enhance the differentiation  
592 and function of NK cells and other mature innate lymphoid cells (33). In normal mice, several rounds of  
593  $V\alpha$ -to- $J\alpha$  rearrangement typically occur on each allele in a DP thymocytes until formation of an  $\alpha\beta$  TCR  
594 that promotes positive selection (47). The decreased  $V\alpha$ -to- $J\alpha$  rearrangements in DP thymocytes of *PG*  
595 mice would correspond with fewer RAG DSBs to signal transcriptional changes in the expression of  
596 proteins that govern selection and/or differentiation of  $\alpha\beta$  T lineage cells. One of these proteins could  
597 enhance Zap70 protein expression, while another might promote NKT1 cell differentiation. Alternatively,  
598 Rag1<sup>P326G</sup> mutation could prevent Rag1 from recruiting and/or ubiquitylating proteins that activate signals  
599 from RAG DSBs to modulate the expression and/or activity of proteins including Zap70. We did not detect  
600 differences in Zap70 activation or other aspects of TCR signaling between *WT* and *PG* thymocytes after  
601 anti-CD3 stimulation (data not shown). However, this approach is not as sensitive for assaying signalling  
602 differences as using tetramers or DCs to present peptides to transgenic  $\alpha\beta$  TCRs of fixed specificity (9,  
603 48, 49), which will be necessary to determine if Rag1<sup>P326G</sup> mutation diminishes TCR signaling in DP  
604 thymocytes. A positive outcome would warrant determining the contribution of reduced Zap70 versus  
605 other protein expression changes.

606

607 The requirement for TCR selection on self-peptides displayed by self-proteins presents major challenges  
608 for establishing conventional and non-conventional  $\alpha\beta$  T cell populations that recognize and respond to a  
609 vast array of diverse foreign peptides, but not self-antigens. Thus, cell intrinsic mechanisms have evolved  
610 to render thymocytes more sensitive to TCR stimulation than their mature  $\alpha\beta$  T cell counterparts (48, 50-  
611 53), a phenomenon called thymic TCR tuning (49, 54-58). Our data are consistent with the possibility that

612 the RAG1 RING domain ubiquitin ligase enhances thymic TCR tuning. Regardless, our study provides a  
613 phenotypic framework from which to elucidate precise molecular mechanisms by which the RAG1 RING  
614 domain regulates TCR gene assembly and selection to establish replete populations of  $\alpha\beta$  T lineage cells  
615 and central tolerance.

616  
617  
618  
619  
620  
621  
622  
623  
624  
625  
626  
627  
628  
629  
630  
631  
632  
633  
634  
635  
636  
637  
638  
639  
640

## Materials and Methods

### Mice

C57BL/6 background *PG* mice were made through gene-targeting as performed by InGenious Targeting Laboratory (2200 Smithtown Avenue, Ronkonkoma, NY). The 9.5 kb genomic DNA used to construct the targeting vector was sub-cloned from a 129Svev BAC clone. The CC>GG double point mutation was shuttled from pJMJ029[P326G](15) into the targeting vector using unique restriction sites, then confirmed by sequencing. Linearized targeting vector was electroporated into BA1 (C57BL/6 x 129/SvEv) embryonic stem (ES) cells. After selection with G418 antibiotic, clones were expanded for PCR analysis to identify recombinant ES clones. Positive clones were screened for short arm integration and then confirmation of the point mutation was performed by PCR and sequencing. Positive clones were analyzed by Southern blot to confirm long arm integration. Injected blastocysts were grown in foster mothers and chimeras were backcrossed against C57BL/6 mice to generate heterozygotes. These were crossed with CMV-*cre* mice (JAX #006054)(60) to remove the *neo* reporter cassette and generate the *Rag1*<sup>P326G</sup> allele. After confirmation of *neo* cassette removal, the strain was backcrossed against C57BL/6, and removal of CMV-*cre* was confirmed by PCR. Sequencing of the entire *Rag1* locus in progeny confirmed the intended CC>GG mutation and an additional T>C point mutation that generates a V238A substitution outside of the RING finger domain. The strain was deposited at the Mutant Mouse Regional Resource Center at the University of North Carolina (RAG1-tm1, MMRRC #: 37105). Before initiating studies described herein, the *Rag1*<sup>P326G</sup> allele was backcrossed for nine generations onto the C57BL/6 background. C57BL/6 background wild-type and *Rag1*<sup>-/-</sup> mice and BALB/c background *Rag1*<sup>-/-</sup> mice were purchased from Jackson Laboratories. All experimental mice were littermates or age-matched with control wild-type animals. All experiments were conducted in accordance with national guidelines and approved by the Institutional Animal Care and Use Committee (IACUC) of the Children's Hospital of Philadelphia.

## 641 **Flow Cytometry**

642 Single cell suspensions of all organs were ACK lysed to remove erythrocytes before being stained with  
643 LIVE/DEAD™ Fixable Aqua Dead Cell Stain Kit (Invitrogen) and antibodies against respective surface  
644 antigens (BD Biosciences, eBioscience, and Biolegend). Cells were stained for respective intracellular  
645 proteins using Cytofix/Cytoperm Fixation/Permeabilization solution kit (BD Biosciences). For staining of  
646 intracellular cytokines, cells ( $1 \times 10^6$ ) were cultured in the absence or presence of 50 ng/ml PMA (Sigma)  
647 and 1 µg/ml Ionomycin (Cell Signaling Technology), with 2 µg/ml brefeldin A (Sigma) and 2 µM  
648 monensin (eBioscience) for 4 hours at 37°C. After staining for LIVE/DEAD and surface antigens, cells  
649 were stained for respective cytokines using the Cytofix/Cytoperm kit (BD Bioscience) or transcription  
650 factors using the FoxP3/Transcription Factor staining kit (eBiosciences). Data were acquired on a  
651 MACSQuant flow cytometer (Miltenyi Biotec) or LSRII Fortessa (BD Biosciences) and analyzed using  
652 Flowjo software version 10.5.3 (Tree Star). Analyses were conducted with the following antibodies: anti-  
653 CD4 (APC-eFluor 780, clone RM4-5, 1:100), anti-CD25 (BUV395, clone PC61, 1:100), anti-TCRβ  
654 (BV711, clone H57-597, 1:100), anti-CD19 (PE, clone 1D3, 1:100), anti-CD11b (PE, clone M1/70, 1:100),  
655 anti-CD11c (PE, clone HL3, 1:100), anti-TER (PE, clone TER-119, 1:100), anti-TCRγ/δ (PE, clone GL3,  
656 1:100), anti-NK-1.1 (PE, clone PK136, 1:100), and anti-B220 (PE, clone RA3-6B2, 1:100) from BD  
657 Biosciences; or anti-CD8α (Pacific Blue, clone 53-6.7, 1:100), anti-CD44 (APC, PerCP/Cy5.5, clone IM7,  
658 1:100), anti-CD24 (PE/Cy7, clone M1/69, 1:100), anti-CD28 (FITC, clone E18, 1:50), anti-CD45.1 (APC,  
659 clone A20, 1:100), anti-CD45.2 (FITC, clone 104, 1:100) from BioLegend.

660

## 661 **Cell Sorting**

662 To isolate DN3 cells, thymocytes were stained with PE-labelled CD4, CD8, CD11b, CD11c, NK1.1, Gr1,  
663 and Ter119. Non-labelled cells were enriched by MACS depletion using anti-PE microbeads and LS  
664 columns (Miltenyi). Enriched cells were then stained with CD4, CD8, CD44, CD25 and anti-lineage/stage  
665 markers (TCRβ, B220, CD19, CD11b, CD11c, TCRδ, NK1.1, Ter119) antibodies. DN3 thymocytes were

666 sorted on Lin<sup>-</sup>CD4<sup>-</sup>CD8<sup>-</sup>CD44<sup>-</sup>CD25<sup>+</sup> phenotype. To isolate DP cells, thymocytes were stained with CD4,  
667 CD8, and anti-lineage (B220, CD19, CD11b, CD11c, TCR $\delta$ , NK1.1, Ter119) antibodies. DP thymocytes  
668 were sorted on Lin<sup>-</sup>CD4<sup>+</sup>CD8<sup>+</sup> phenotype. The cells of interest were isolated using a FACS Aria Fusion  
669 sorter (BD Biosciences).

670

### 671 **Analyzing *Tcrb* and *Tcra* Rearrangements**

672 Genomic DNA was extracted from DN3 or DP cells using the DNeasy Blood and Tissue kit (Qiagen). To  
673 measure *Tcrb* rearrangements in DN3 cells, a Taqman PCR assay was used to quantify V $\beta$ -to-DJ $\beta$ 1.1 and  
674 V $\beta$ -to-DJ $\beta$ 2.1 rearrangement levels with a primer specific for each V $\beta$  paired and a probe, FAM or HEX,  
675 specific for J $\beta$ 1.1 or J $\beta$ 2.1, respectively. Taqman PCR was performed with conditions according to the  
676 manufacturer's instructions (IDT DNA) on the ViiA 7 system (Applied Biosystems). PCR of CD19 was  
677 used for normalization. Primers, probes, and reaction conditions are as described (61). To assay *Tcrb*  
678 repertoire, DNA from DN3 thymocytes were sent to Adaptive Biotechnologies, who used multiplex PCR  
679 to amplify and deep sequence V $\beta$ -D $\beta$ -J $\beta$  rearrangements. Gene segment usage was analyzed by  
680 ImmunoSEQ Analyzer software (Adaptive Biotechnologies). To assess *Tcra* rearrangements in DP cells,  
681 representative V $\alpha$ -J $\alpha$  rearrangements were quantified using a QuantiFast SYBR Green PCR kit (Qiagen)  
682 on the ViiA 7 system (Applied Biosystems) as described (62, 63). PCR of  $\beta$ 2M was used for normalization.  
683 We quantified V $\alpha$ 14-J $\alpha$ 18 rearrangements as described (64).

684

### 685 **RT-qPCR for mRNA Expression**

686 Respective cell populations were lysed in RLT buffer (Qiagen) containing 2-mercaptoethanol or TRIzol  
687 (Life Technologies) immediately after cell sorting. Total RNA was isolated using RNeasy Mini kit  
688 (Qiagen), treated with DNase (RNase-Free DNase Set, Qiagen), and reverse transcribed to generate cDNA  
689 with High-Capacity RNA-to-cDNA™ Kit (Thermo-Fisher Scientific) according to manufacturer's



690 directions. The cDNA was subjected to qPCR using Power SYBR Green kit (Applied Biosystems) and  
691 actin, HPRT, ZAP70, and SYK primers (Qiagen). Relative expression was calculated using the ddCt  
692 method, using actin or HPRT as a housekeeping gene, and relevant calibrator sample (explained in figure  
693 legends for respective samples).

694

### 695 **Competitive Mixed Bone Marrow Chimeric Mice**

696 6-week-old CD45.1 B6.SJL (WT) hosts were lethally irradiated (950 Rad on an X-RAD irradiator). Bone  
697 marrow from at least 3 pooled donors (CD45.1 WT only, CD45.2 RAG P326G mutant only, or mixed)  
698 was sterilely prepped and RBCs lysed. Acceptable mixing (CD45.1/CD45.2 ratio) was confirmed by flow  
699 cytometry. Then,  $3\text{-}5 \times 10^6$  total cells were injected intravenously into hosts 6 hours after irradiation. Mice  
700 were monitored over 8 weeks for graft rejection and graft-versus-host disease prior to euthanasia for  
701 analysis. Engraftment was measured using the following antibodies from Biolegend: anti-CD45.1 (APC-  
702 Cy7, clone A20, 1:100), anti-CD45.2 (FITC, Clone 104, 1:100), anti-NK1.1 (PE, clone PK136, 1:200),  
703 anti-CD44 (PerCP-Cy5.5, clone IM7, 1:100), anti CD24 (PE-Cy7, clone M1/69, 1:100), and anti-TCR $\beta$   
704 (Pacific blue, clone H57-597, 1:100). CD1d tetramer from the NIH Tetramer Core (APC, 1:100) was a  
705 gift of Dr. Hamid Bassiri. Data were collected on a MACSQuant 10 (Miltenyi Biotec) and were analyzed  
706 using FlowJo software, version 10.

707

### 708 ***In vitro* T Cell Differentiation**

709 Splenocytes from C57BL/6 background *Rag1*<sup>-/-</sup> mice were irradiated with 2,500 Rads (X-rad irradiator)  
710 and  $3 \times 10^5$  cells were seeded into each well of a 96 well plate. Naïve T cells (CD90.2<sup>+</sup>, CD4<sup>+</sup>, CD62L<sup>+</sup>,  
711 CD44<sup>+</sup>, CD25<sup>-</sup>) were sorted from C57BL/6 background *WT* or *Rag1*<sup>-/-</sup> mice using a FACSaria Fusion cell  
712 sorter (BD Biosciences), and  $3 \times 10^4$  sorted cells were added to each well containing irradiated feeder  
713 cells. All cells were cultured with 10  $\mu\text{g}/\text{ml}$  anti-CD3 (Biolegend) and 3  $\mu\text{g}/\text{ml}$  anti-CD28 (Biolegend) in  
714 RPMI with 10% FBS, 1% PSG, and 1x NEAA (Invitrogen), 1x Sodium Pyruvate (Invitrogen), and 0.001%

715 2-mercaptoethanol. rhIL-2 was used at 30 IU/mL, rmIL-12 and rmIL-4 at 10 ng/mL, rmIL-6 at 20 ng/mL,  
716 mTGF $\beta$ 1 at 1 ng/mL, anti-mIL-4, anti-mIFN $\gamma$  and anti-mIL-12 at 10  $\mu$ g/mL (from Biolegend except rhIL-  
717 2, rmIL-12, and rmIL-6 from Preprotech). The following cytokines/blocking antibodies were used to skew  
718 towards respective Th-subsets: Th0 condition: rhIL-2; Th1 condition: rhIL-2, rmIL-12 and anti-mIL-4;  
719 Th2 condition: rhIL-2, rmIL-4, anti-mIFN $\gamma$  and anti-mIL-12; Th17 condition: rhIL-2, mIL-6, mTGF $\beta$ 1,  
720 anti-mIL-4 and anti-mIL-12; Treg condition: rhIL-2, mTGF $\beta$ 1, anti-mIL-4 and anti-mIL-12.

721

## 722 **LCMV Infections**

723 Mice were infected intraperitoneally with  $2 \times 10^5$  plaque-forming units of LCMV-Armstrong and  
724 euthanized at indicated timepoints. Virus and gp33-tetramer were kindly provided by E. John Wherry  
725 (University of Pennsylvania).

726

## 727 **T Cell Transfer Model of Colitis**

728 This model was performed as described (37). Briefly, naïve CD4<sup>+</sup> T cells were sorted from respective  
729 donor mice (CD90.2<sup>+</sup>, CD4<sup>+</sup>, CD62L<sup>+</sup>, CD44<sup>-</sup>, CD25<sup>-</sup>) on a FACSAria Fusion cell sorter.  $0.5 \times 10^6$  cells  
730 were transferred in 100  $\mu$ l of PBS into each of the donor mice via intraperitoneal injection. Non-transferred  
731 mice were injected with PBS. Mice were weighed weekly for the first 4 weeks, and then twice weekly for  
732 4 weeks. Mice were euthanized 8 weeks post-transfer unless severe morbidity enforced premature  
733 euthanasia (in accordance with CHOP IACUC approved guidelines) or spontaneous death occurred.

734

## 735 **Statistical analysis**

736 All data was analyzed in Graphpad Prism 8 using statistical tests indicated in the figure legends. Error  
737 bars indicate mean  $\pm$  SEM unless otherwise stated. n.s.= $p > 0.05$ , \* $p < 0.05$ , \*\* $p < 0.01$ , \*\*\* $p < 0.001$ ,  
738 \*\*\*\* $p < 0.0001$ .

739

## Acknowledgements

740

The authors have no competing financial interests to declare.

741  
742  
743  
744  
745  
746  
747  
748  
749  
750  
751  
752  
753  
754  
755  
756  
757  
758  
759  
760  
761  
762  
763  
764  
765  
766  
767  
768  
769  
770  
771  
772  
773  
774  
775  
776  
777  
778  
779  
780  
781  
782  
783  
784  
785  
786  
787  
788  
789

## References

1. Bassing, C. H., W. Swat, and F. W. Alt. 2002. The mechanism and regulation of chromosomal V(D)J recombination. *Cell* 109 Suppl: S45-55.
2. Schatz, D. G., and P. C. Swanson. 2011. V(D)J recombination: mechanisms of initiation. *Annu Rev Genet* 45: 167-202.
3. Bhandoola, A., H. von Boehmer, H. T. Petrie, and J. C. Zuniga-Pflucker. 2007. Commitment and developmental potential of extrathymic and intrathymic T cell precursors: plenty to choose from. *Immunity* 26: 678-689.
4. von Boehmer, H., and F. Melchers. 2010. Checkpoints in lymphocyte development and autoimmune disease. *Nat Immunol* 11: 14-20.
5. Carico, Z., and M. S. Krangel. 2015. Chromatin Dynamics and the Development of the TCRalpha and TCRdelta Repertoires. *Adv Immunol* 128: 307-361.
6. Hogquist, K. A., and S. C. Jameson. 2014. The self-obsession of T cells: how TCR signaling thresholds affect fate 'decisions' and effector function. *Nat Immunol* 15: 815-823.
7. Gascoigne, N. R., V. Rybakin, O. Acuto, and J. Brzostek. 2016. TCR Signal Strength and T Cell Development. *Annu Rev Cell Dev Biol* 32: 327-348.
8. Klein, L., B. Kyewski, P. M. Allen, and K. A. Hogquist. 2014. Positive and negative selection of the T cell repertoire: what thymocytes see (and don't see). *Nat Rev Immunol* 14: 377-391.
9. Fu, G., V. Rybakin, J. Brzostek, W. Paster, O. Acuto, and N. R. Gascoigne. 2014. Fine-tuning T cell receptor signaling to control T cell development. *Trends Immunol* 35: 311-318.
10. Jones, J. M., and M. Gellert. 2003. Autoubiquitylation of the V(D)J recombinase protein RAG1. *Proc Natl Acad Sci U S A* 100: 15446-15451.
11. Singh, S. K., and M. Gellert. 2015. Role of RAG1 autoubiquitination in V(D)J recombination. *Proc Natl Acad Sci U S A* 112: 8579-8583.
12. Jones, J. M., A. Bhattacharyya, C. Simkus, B. Vallieres, T. D. Veenstra, and M. Zhou. 2011. The RAG1 V(D)J recombinase/ubiquitin ligase promotes ubiquitylation of acetylated, phosphorylated histone 3.3. *Immunol Lett* 136: 156-162.
13. Grazini, U., F. Zanardi, E. Citterio, S. Casola, C. R. Goding, and F. McBlane. 2010. The RING domain of RAG1 ubiquitylates histone H3: a novel activity in chromatin-mediated regulation of V(D)J joining. *Mol Cell* 37: 282-293.
14. Deng, Z., H. Liu, and X. Liu. 2015. RAG1-mediated ubiquitylation of histone H3 is required for chromosomal V(D)J recombination. *Cell Res* 25: 181-192.
15. Simkus, C., P. Anand, A. Bhattacharyya, and J. M. Jones. 2007. Biochemical and folding defects in a RAG1 variant associated with Omenn syndrome. *J Immunol* 179: 8332-8340.
16. Villa, A., C. Sobacchi, L. D. Notarangelo, F. Bozzi, M. Abinun, T. G. Abrahamsen, P. D. Arkwright, M. Baniyash, E. G. Brooks, M. E. Conley, P. Cortes, M. Duse, A. Fasth, A. M. Filipovich, A. J. Infante, A. Jones, E. Mazzolari, S. M. Muller, S. Pasic, G. Rechavi, M. G. Sacco, S. Santagata, M. L. Schroeder, R. Seger, D. Strina, A. Ugazio, J. Valiaho, M. Vihinen, L. B. Vogler, H. Ochs, P. Vezzoni, W. Friedrich, and K. Schwarz. 2001. V(D)J recombination defects in lymphocytes due to RAG mutations: severe immunodeficiency with a spectrum of clinical presentations. *Blood* 97: 81-88.
17. Zheng, N., P. Wang, P. D. Jeffrey, and N. P. Pavletich. 2000. Structure of a c-Cbl-UbcH7 complex: RING domain function in ubiquitin-protein ligases. *Cell* 102: 533-539.
18. Albert, T. K., H. Hanzawa, Y. I. Legtenberg, M. J. de Ruwe, F. A. van den Heuvel, M. A. Collart, R. Boelens, and H. T. Timmers. 2002. Identification of a ubiquitin-protein ligase subunit within the CCR4-NOT transcription repressor complex. *EMBO J* 21: 355-364.
19. Beilinson, H. A., R. A. Glynn, A. D. Yadavalli, J. Xiao, E. Corbett, H. Saribasak, R. Arya, C. Miot, A. Bhattacharyya, J. M. Jones, J. M. R. Pongubala, C. H. Bassing, and D. G. Schatz. 2021. The

- 790 RAG1 N-terminal region regulates the efficiency and pathways of synapsis for V(D)J  
791 recombination. *J Exp Med* 218.
- 792 20. Liang, H. E., L. Y. Hsu, D. Cado, L. G. Cowell, G. Kelsoe, and M. S. Schlissel. 2002. The  
793 "dispensable" portion of RAG2 is necessary for efficient V-to-DJ rearrangement during B and T  
794 cell development. *Immunity* 17: 639-651.
- 795 21. Horowitz, J. E., and C. H. Bassing. 2014. Noncore RAG1 regions promote Vbeta rearrangements  
796 and alphabeta T cell development by overcoming inherent inefficiency of Vbeta recombination  
797 signal sequences. *J Immunol* 192: 1609-1619.
- 798 22. Williams, J. A., K. S. Hathcock, D. Klug, Y. Harada, B. Choudhury, J. P. Allison, R. Abe, and R.  
799 J. Hodes. 2005. Regulated costimulation in the thymus is critical for T cell development:  
800 dysregulated CD28 costimulation can bypass the pre-TCR checkpoint. *J Immunol* 175: 4199-4207.
- 801 23. Bredemeyer, A. L., B. A. Helmink, C. L. Innes, B. Calderon, L. M. McGinnis, G. K. Mahowald,  
802 E. J. Gapud, L. M. Walker, J. B. Collins, B. K. Weaver, L. Mandik-Nayak, R. D. Schreiber, P. M.  
803 Allen, M. J. May, R. S. Paules, C. H. Bassing, and B. P. Sleckman. 2008. DNA double-strand  
804 breaks activate a multi-functional genetic program in developing lymphocytes. *Nature* 456: 819-  
805 823.
- 806 24. Bednarski, J. J., A. Nickless, D. Bhattacharya, R. H. Amin, M. S. Schlissel, and B. P. Sleckman.  
807 2012. RAG-induced DNA double-strand breaks signal through Pim2 to promote pre-B cell  
808 survival and limit proliferation. *J Exp Med* 209: 11-17.
- 809 25. Bednarski, J. J., R. Pandey, E. Schulte, L. S. White, B. R. Chen, G. J. Sandoval, M. Kohyama, M.  
810 Haldar, A. Nickless, A. Trott, G. Cheng, K. M. Murphy, C. H. Bassing, J. E. Payton, and B. P.  
811 Sleckman. 2016. RAG-mediated DNA double-strand breaks activate a cell type-specific  
812 checkpoint to inhibit pre-B cell receptor signals. *J Exp Med* 213: 209-223.
- 813 26. Jordan, M. S., J. E. Smith, J. C. Burns, J. E. Austin, K. E. Nichols, A. C. Aschenbrenner, and G.  
814 A. Koretzky. 2008. Complementation in trans of altered thymocyte development in mice  
815 expressing mutant forms of the adaptor molecule SLP76. *Immunity* 28: 359-369.
- 816 27. Surh, C. D., and J. Sprent. 1994. T-cell apoptosis detected in situ during positive and negative  
817 selection in the thymus. *Nature* 372: 100-103.
- 818 28. Wilson, A., C. Marechal, and H. R. MacDonald. 2001. Biased V beta usage in immature  
819 thymocytes is independent of DJ beta proximity and pT alpha pairing. *J Immunol* 166: 51-57.
- 820 29. Rossjohn, J., D. G. Pellicci, O. Patel, L. Gapin, and D. I. Godfrey. 2012. Recognition of CD1d-  
821 restricted antigens by natural killer T cells. *Nat Rev Immunol* 12: 845-857.
- 822 30. Krovi, S. H., and L. Gapin. 2018. Invariant Natural Killer T Cell Subsets-More Than Just  
823 Developmental Intermediates. *Front Immunol* 9: 1393.
- 824 31. Dashtsoodol, N., S. Bortoluzzi, and M. Schmidt-Supprian. 2019. T Cell Receptor Expression  
825 Timing and Signal Strength in the Functional Differentiation of Invariant Natural Killer T Cells.  
826 *Front Immunol* 10: 841.
- 827 32. Hogquist, K., and H. Georgiev. 2020. Recent advances in iNKT cell development. *F1000Res* 9.
- 828 33. Karo, J. M., D. G. Schatz, and J. C. Sun. 2014. The RAG recombinase dictates functional  
829 heterogeneity and cellular fitness in natural killer cells. *Cell* 159: 94-107.
- 830 34. Jiang, W., M. S. Anderson, R. Bronson, D. Mathis, and C. Benoist. 2005. Modifier loci condition  
831 autoimmunity provoked by Aire deficiency. *J Exp Med* 202: 805-815.
- 832 35. Jin, Y., A. Lee, J. H. Oh, H. W. Lee, and S. J. Ha. 2019. The R229Q mutation of Rag2 does not  
833 characterize severe immunodeficiency in mice. *Sci Rep* 9: 4415.
- 834 36. Mottet, C., H. H. Uhlig, and F. Powrie. 2003. Cutting edge: cure of colitis by CD4+CD25+  
835 regulatory T cells. *J Immunol* 170: 3939-3943.
- 836 37. Ostanin, D. V., J. Bao, I. Koboziev, L. Gray, S. A. Robinson-Jackson, M. Kosloski-Davidson, V.  
837 H. Price, and M. B. Grisham. 2009. T cell transfer model of chronic colitis: concepts,  
838 considerations, and tricks of the trade. *Am J Physiol Gastrointest Liver Physiol* 296: G135-146.

- 839 38. Eri, R., M. A. McGuckin, and R. Wadley. 2012. T cell transfer model of colitis: a great tool to  
840 assess the contribution of T cells in chronic intestinal inflammation. *Methods Mol Biol* 844: 261-  
841 275.
- 842 39. Livak, F., D. B. Burtrum, L. Rowen, D. G. Schatz, and H. T. Petrie. 2000. Genetic modulation of  
843 T cell receptor gene segment usage during somatic recombination. *J Exp Med* 192: 1191-1196.
- 844 40. Bortoluzzi, S., N. Dashtsoodol, T. Engleitner, C. Drees, S. Helmuth, J. Mir, A. Toska, M.  
845 Flossdorf, R. Ollinger, M. Solovey, M. Colome-Tatche, B. Kalfaoglu, M. Ono, T. Buch, T.  
846 Ammon, R. Rad, and M. Schmidt-Supprian. 2021. Brief homogeneous TCR signals instruct  
847 common iNKT progenitors whose effector diversification is characterized by subsequent cytokine  
848 signaling. *Immunity* 54: 2497-2513 e2499.
- 849 41. Cameron, G., D. G. Pellicci, A. P. Uldrich, G. S. Besra, P. Illarionov, S. J. Williams, N. L. La  
850 Gruta, J. Rossjohn, and D. I. Godfrey. 2015. Antigen Specificity of Type I NKT Cells Is Governed  
851 by TCR beta-Chain Diversity. *J Immunol* 195: 4604-4614.
- 852 42. Negishi, I., N. Motoyama, K. Nakayama, K. Nakayama, S. Senju, S. Hatakeyama, Q. Zhang, A.  
853 C. Chan, and D. Y. Loh. 1995. Essential role for ZAP-70 in both positive and negative selection  
854 of thymocytes. *Nature* 376: 435-438.
- 855 43. Hsu, L. Y., Y. X. Tan, Z. Xiao, M. Malissen, and A. Weiss. 2009. A hypomorphic allele of ZAP-  
856 70 reveals a distinct thymic threshold for autoimmune disease versus autoimmune reactivity. *J Exp*  
857 *Med* 206: 2527-2541.
- 858 44. Sakaguchi, N., T. Takahashi, H. Hata, T. Nomura, T. Tagami, S. Yamazaki, T. Sakihama, T.  
859 Matsutani, I. Negishi, S. Nakatsuru, and S. Sakaguchi. 2003. Altered thymic T-cell selection due  
860 to a mutation of the ZAP-70 gene causes autoimmune arthritis in mice. *Nature* 426: 454-460.
- 861 45. Zhao, M., M. N. D. Svensson, K. Venken, A. Chawla, S. Liang, I. Engel, P. Mydel, J. Day, D.  
862 Elewaut, N. Bottini, and M. Kronenberg. 2018. Altered thymic differentiation and modulation of  
863 arthritis by invariant NKT cells expressing mutant ZAP70. *Nat Commun* 9: 2627.
- 864 46. Tuttle, K. D., S. H. Krovi, J. Zhang, R. Bedel, L. Harmacek, L. K. Peterson, L. L. Dragone, A.  
865 Lefferts, C. Halluszczak, K. Riemondy, J. R. Hesselberth, A. Rao, B. P. O'Connor, P. Marrack, J.  
866 Scott-Browne, and L. Gapin. 2018. TCR signal strength controls thymic differentiation of iNKT  
867 cell subsets. *Nat Commun* 9: 2650.
- 868 47. Huang, C. Y., B. P. Sleckman, and O. Kanagawa. 2005. Revision of T cell receptor {alpha} chain  
869 genes is required for normal T lymphocyte development. *Proc Natl Acad Sci U S A* 102: 14356-  
870 14361.
- 871 48. Davey, G. M., S. L. Schober, B. T. Endrizzi, A. K. Dutcher, S. C. Jameson, and K. A. Hogquist.  
872 1998. Preselection thymocytes are more sensitive to T cell receptor stimulation than mature T cells.  
873 *J Exp Med* 188: 1867-1874.
- 874 49. Fu, G., J. Casas, S. Rigaud, V. Rybakina, F. Lambomez, J. Brzostek, J. A. Hoerter, W. Paster, O.  
875 Acuto, H. Cheroutre, K. Sauer, and N. R. Gascoigne. 2013. Themis sets the signal threshold for  
876 positive and negative selection in T-cell development. *Nature* 504: 441-445.
- 877 50. Lucas, B., I. Stefanova, K. Yasutomo, N. Dautigny, and R. N. Germain. 1999. Divergent changes  
878 in the sensitivity of maturing T cells to structurally related ligands underlies formation of a useful  
879 T cell repertoire. *Immunity* 10: 367-376.
- 880 51. Yachi, P. P., C. Lotz, J. Ampudia, and N. R. Gascoigne. 2007. T cell activation enhancement by  
881 endogenous pMHC acts for both weak and strong agonists but varies with differentiation state. *J*  
882 *Exp Med* 204: 2747-2757.
- 883 52. Pircher, H., U. H. Rohrer, D. Moskophidis, R. M. Zinkernagel, and H. Hengartner. 1991. Lower  
884 receptor avidity required for thymic clonal deletion than for effector T-cell function. *Nature* 351:  
885 482-485.
- 886 53. Sant'Angelo, D. B., and C. A. Janeway, Jr. 2002. Negative selection of thymocytes expressing the  
887 D10 TCR. *Proc Natl Acad Sci U S A* 99: 6931-6936.

- 888 54. Fu, G., S. Vallee, V. Rybakin, M. V. McGuire, J. Ampudia, C. Brockmeyer, M. Salek, P. R. Fallen,  
889 J. A. Hoerter, A. Munshi, Y. H. Huang, J. Hu, H. S. Fox, K. Sauer, O. Acuto, and N. R. Gascoigne.  
890 2009. Themis controls thymocyte selection through regulation of T cell antigen receptor-mediated  
891 signaling. *Nat Immunol* 10: 848-856.
- 892 55. Lesourne, R., S. Uehara, J. Lee, K. D. Song, L. Li, J. Pinkhasov, Y. Zhang, N. P. Weng, K. F.  
893 Wildt, L. Wang, R. Bosselut, and P. E. Love. 2009. Themis, a T cell-specific protein important for  
894 late thymocyte development. *Nat Immunol* 10: 840-847.
- 895 56. Johnson, A. L., L. Aravind, N. Shulzhenko, A. Morgun, S. Y. Choi, T. L. Crockford, T. Lambe,  
896 H. Domaschitz, E. M. Kucharska, L. Zheng, C. G. Vinuesa, M. J. Lenardo, C. C. Goodnow, R. J.  
897 Cornall, and R. H. Schwartz. 2009. Themis is a member of a new metazoan gene family and is  
898 required for the completion of thymocyte positive selection. *Nat Immunol* 10: 831-839.
- 899 57. Wang, D., M. Zheng, L. Lei, J. Ji, Y. Yao, Y. Qiu, L. Ma, J. Lou, C. Ouyang, X. Zhang, Y. He, J.  
900 Chi, L. Wang, Y. Kuang, J. Wang, X. Cao, and L. Lu. 2012. Tspal1 is involved in late thymocyte  
901 development through the regulation of TCR-mediated signaling. *Nat Immunol* 13: 560-568.
- 902 58. Li, Q. J., J. Chau, P. J. Ebert, G. Sylvester, H. Min, G. Liu, R. Braich, M. Manoharan, J. Soutschek,  
903 P. Skare, L. O. Klein, M. M. Davis, and C. Z. Chen. 2007. miR-181a is an intrinsic modulator of  
904 T cell sensitivity and selection. *Cell* 129: 147-161.
- 905 59. Marrella, V., P. L. Poliani, A. Casati, F. Rucci, L. Frascoli, M. L. Gougeon, B. Lemercier, M.  
906 Bosticardo, M. Ravanini, M. Battaglia, M. G. Roncarolo, M. Cavazzana-Calvo, F. Facchetti, L. D.  
907 Notarangelo, P. Vezzoni, F. Grassi, and A. Villa. 2007. A hypomorphic R229Q Rag2 mouse  
908 mutant recapitulates human Omenn syndrome. *J Clin Invest* 117: 1260-1269.
- 909 60. Schwenk, F., U. Baron, and K. Rajewsky. 1995. A cre-transgenic mouse strain for the ubiquitous  
910 deletion of loxP-flanked gene segments including deletion in germ cells. *Nucleic Acids Res* 23:  
911 5080-5081.
- 912 61. Gopalakrishnan, S., K. Majumder, A. Predeus, Y. Huang, O. I. Koues, J. Verma-Gaur, S.  
913 Loguercio, A. I. Su, A. J. Feeney, M. N. Artyomov, and E. M. Oltz. 2013. Unifying model for  
914 molecular determinants of the preselection Vbeta repertoire. *Proc Natl Acad Sci U S A* 110: E3206-  
915 3215.
- 916 62. Shih, H. Y., J. Verma-Gaur, A. Torkamani, A. J. Feeney, N. Galjart, and M. S. Krangel. 2012.  
917 Tera gene recombination is supported by a Tera enhancer- and CTCF-dependent chromatin hub.  
918 *Proc Natl Acad Sci U S A* 109: E3493-3502.
- 919 63. Chen, L., Z. Carico, H. Y. Shih, and M. S. Krangel. 2015. A discrete chromatin loop in the mouse  
920 Tera-Tcrd locus shapes the TCRdelta and TCRalpha repertoires. *Nat Immunol* 16: 1085-1093.
- 921 64. Gapin, L., J. L. Matsuda, C. D. Surh, and M. Kronenberg. 2001. NKT cells derive from double-  
922 positive thymocytes that are positively selected by CD1d. *Nat Immunol* 2: 971-978.
- 923  
924  
925  
926  
927  
928  
929  
930  
931

932

### Footnotes

933 This work was supported by the Fondation ARC pour la recherche sur le cancer (C.M.), La Ligue contre  
934 le cancer (C.M.), Fondation Pasteur Mutualite (C.M.), Nancy Taylor Foundation for Chronic Disease  
935 (E.M.B.) and NIH grants R03 AI097611 (J.M.J.), R01 HL112836 (E.M.B.), R01 AI121250-A1  
936 (E.M.B.), R21 A1 135435 (C.H.B.), and RO1 AI 112621 (C.H.B.).  
937



938

## Supplemental Figures

Supplemental Figure 1

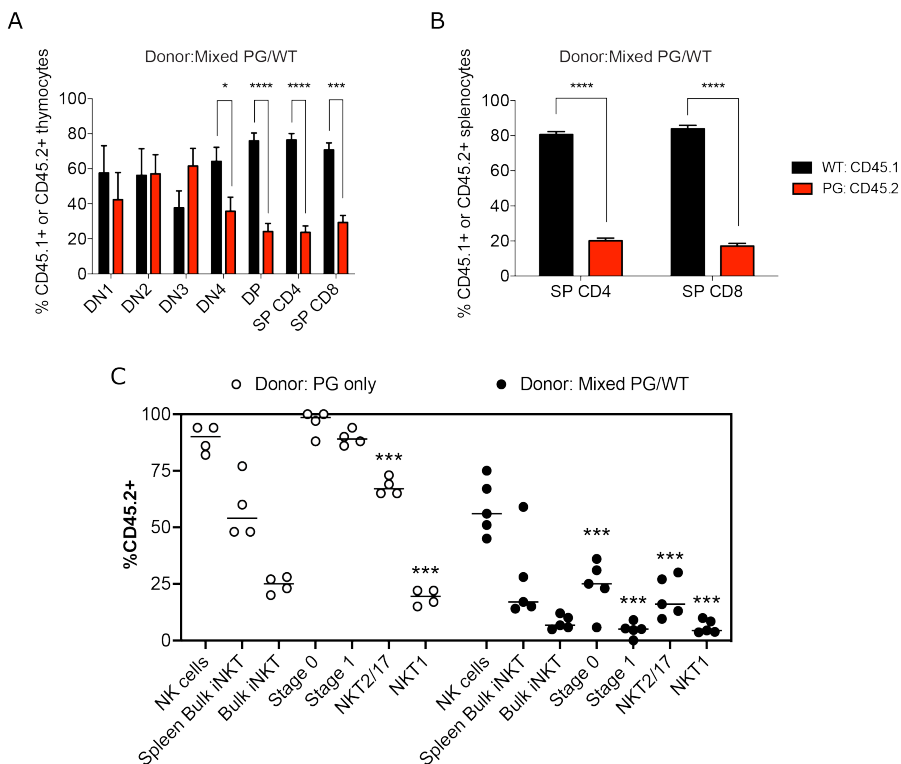

939

940

**Supplemental Figure 1. PG thymocytes exhibit cell intrinsic deficiencies in developmental progression.**

941

**(A-B)** Shown are percent of donor *PG* (CD45.2<sup>+</sup>) or *WT* (CD45.1<sup>+</sup>) cells within indicated (A) thymocyte

942

or (B) splenocyte populations after transfer of a 1:1 mix of *PG* and *WT* bone marrow into lethally irradiated

943

*WT* congenic (CD45.1<sup>+</sup>) recipients. Bone marrow was pooled from three donors of each genotype and

944

injected into five recipients, all analyzed on the same day. Data represented as mean +/- SEM. Statistics

945

calculated with multiple t tests using the Holm-Sidak method. \* $p < 0.05$ , \*\*\* $p < 0.0005$ , \*\*\*\* $p < 0.00005$ .

946

**(C)** Shown are percent donor *PG* (CD45.2<sup>+</sup>) chimerism in indicated compartments after lethal irradiation

947

of *WT* congenic (CD45.1<sup>+</sup>) recipients. Open circles show percent *PG* chimerism after transfer of only *PG*

948

bone marrow, while filled circles show *PG* chimerism in a 1:1 competitive setting with *WT* cells. *PG*

949

bone marrow reconstitutes the blood NK cell compartment at expected ratios. In mice receiving only *PG*

950

bone marrow, *PG* chimerism in bulk splenic iNKT ( $p < 0.0001$ ), bulk thymic iNKT ( $p < 0.0001$ ), NKT2/17

951

( $p = 0.001$ ), and NKT1 ( $p < 0.0001$ ) are all significantly reduced relative to blood NK cells by one-way

952

ANOVA with Dunnett multiple comparisons test. In mice receiving 1:1 mixed *PG* and *WT* bone marrow,

953 *PG* chimerism in bulk splenic iNKT ( $p=0.0002$ ), bulk thymic iNKT ( $p<0.0001$ ), Stage 0 iNKT ( $p<0.0001$ ),  
954 Stage 1 iNKT ( $p<0.0001$ ), Stage 2 iNKT ( $p=0.001$ ), and Stage 3 iNKT ( $p<0.0001$ ) are all significantly  
955 reduced relative to blood NK cells. Bone marrow was pooled from three donors and injected into 4-5  
956 mice per group, all analyzed on the same day.

957

958

959

960

961

962

963

964

965

966

967

968

969

970

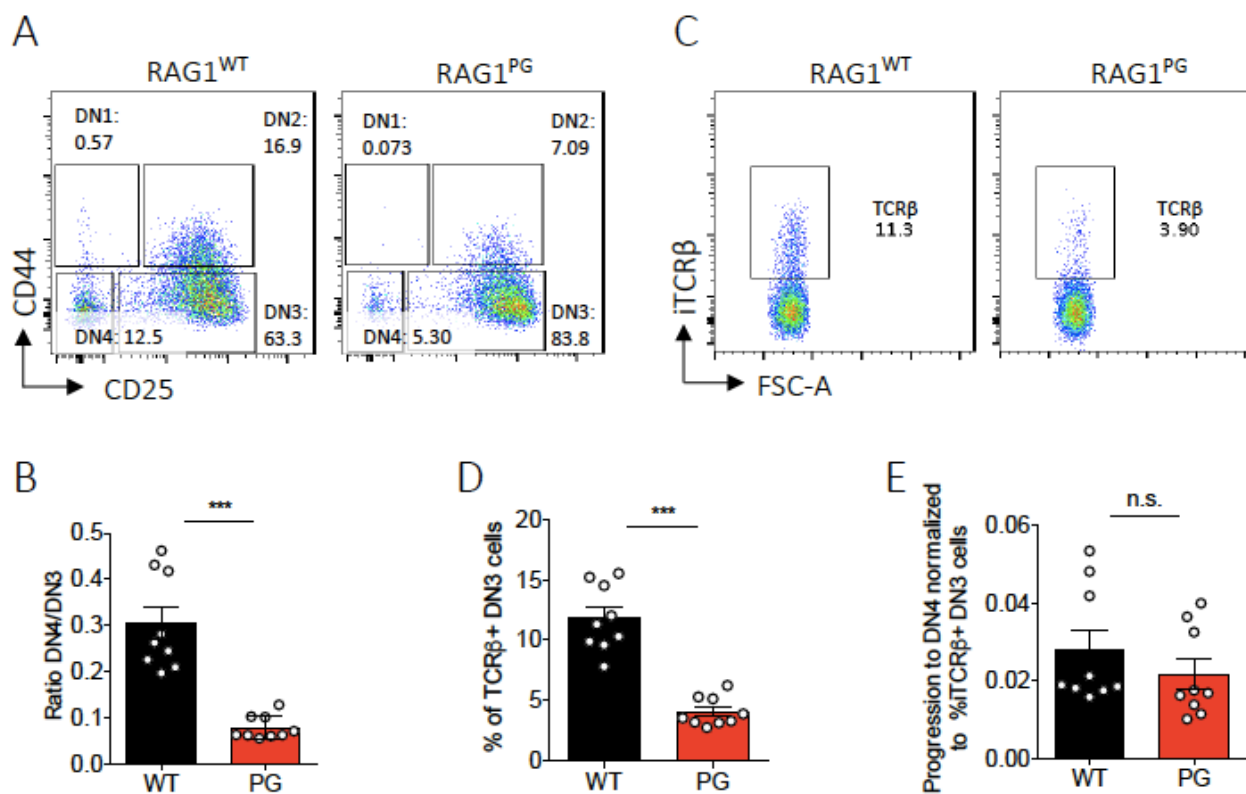

971

972 **Supplemental Figure 2.** *PG* mice exhibit normal efficiency of pre-TCR signaled DN3-to-DN4 thymocyte

973 differentiation. **(A)** Representative flow cytometry plots of DN stages of thymocyte development showing

974 the frequency of cells at the DN3 and DN4 stages. **(B)** Quantification of percentages of DN3 cells that

975 transition into DN4 cells. Shown are all data points and average values +/- SEM from three independent

976 experiments, each with three mice of each genotype (n = 9 mice per genotype, analyzed by multiple t tests

977 using the Holm-Sidak method; \*\*\* p < 0.0005). **(C)** Representative flow cytometry plots of intracellular

978 TCR $\beta$  protein expression in DN3 thymocytes showing the frequency of TCR $\beta^+$  cells in each gate. **(D)**

979 Quantification of percentages of DN3 cells expressing intracellular TCR $\beta$  protein. **(E)** Ratios comparing

980 the percentages of DN3 cells expressing intracellular TCR $\beta$  protein to the percentages of DN3 cells that

981 transition into DN4 cells. (D-E) Shown are all data points and average values +/- SEM from three

982 independent experiments each with three mice of each genotype (n = 9 mice per genotype, analyzed by

983 unpaired t-test with Welch's correction; n.s. p > 0.05, \*\*\* p < 0.0005

Supplemental Figure 3

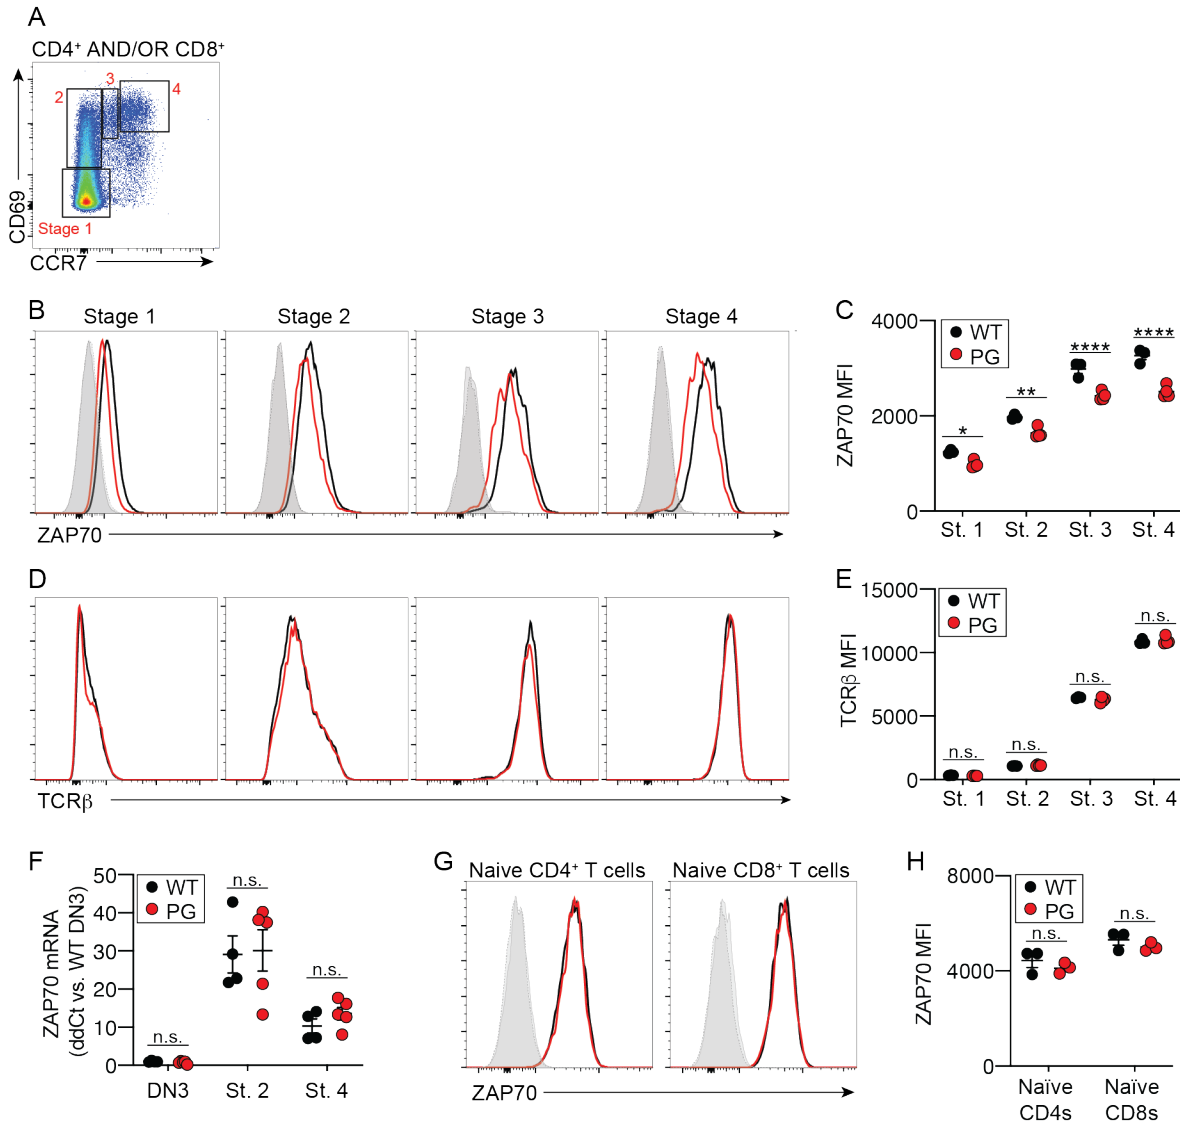

984

985 **Supplemental Figure 3.**

986 Thymocytes of PD mice have reduced Zap70 protein levels **(A)** Example gating strategy for Stage 1 -

987 Stage 4 selecting thymocytes as depicted in Figure 4 and 5. Pre-gating: Live, singlets, CD4<sup>+</sup> AND/OR

988 CD8<sup>+</sup>. Stage 1 = CD69<sup>-</sup>CCR7<sup>-</sup>, Stage 2 = CD69<sup>+</sup>CCR7<sup>-</sup>, Stage 3 = CD69<sup>+</sup>CCR7<sup>int</sup>, Stage 4 =

989 CD69<sup>+</sup>CCR7<sup>hi</sup>. **(B-E)** Representative flow cytometry histogram plots (B, D) and quantification (C, E) of

990 Zap70 (B, C) and TCRβ (D, E) protein in Stages 1-4 of αβ TCR selection. (C, E) Shown are all data points

991 and average values +/- SEM from one of three independent experiments (n = 4-5 mice per genotype, 2-

992 way ANOVA with Sidak's multiple comparison post-test) **(F)** qRT-PCR quantification of Zap70 mRNA

993 in DN3 cells or Stage 2 or 4 cells. Relative mRNA levels were calculated using ddCt method with signals  
994 from each assay normalized to values from an assay for the Hprt gene. Shown are all data points and  
995 average values +/- SEM from one experiment (n = 4-5 mice per genotype, 2-way ANOVA with sidak  
996 multiple comparison post-test. **(G-H)** Representative flow cytometry histogram plots (G) and  
997 quantification (H) of Zap70 protein in naïve CD4<sup>+</sup> or CD8<sup>+</sup> T cells. Shown are all data points and average  
998 values +/- SEM from two independent experiments (n = 3 mice per genotype, 2-way ANOVA with Sidak  
999 multiple comparison post-test). For all graphs in figure: n.s. p>0.05; \* p<0.05, \*\*p<0.01, \*\*\* p<0.001,  
1000 \*\*\*\* p<0.0001.

1001
